# Supplementary material for: Multicomponent polymerization toward biodegradable polymers with diverse responsiveness in tumor microenvironments
Source: Royal Society of Chemistry journal article supplement (doi:10.1039/c9py01576k), 2019-12-23
Supplement: c9py01576k1.pdf [file c9py01576k1.pdf]

Electronic Supplementary Information (ESI)

Multicomponent Polymerization toward  
Biodegradable Polymers with Diverse  
Responsiveness in Tumor Microenvironments

*Junnan He, Nan Zheng, Dan Xie, Yubin Zheng \*, and Wangze Song \**

State Key Laboratory of Fine Chemicals, School of Chemical Engineering, Dalian

University of Technology, Linggong Rd.2, Dalian, Liaoning, 116023 (China)

Email: wzsong@dlut.edu.cn (W. Song); [zybwl@163.com](mailto:zybwl@163.com) (Y. Zheng)

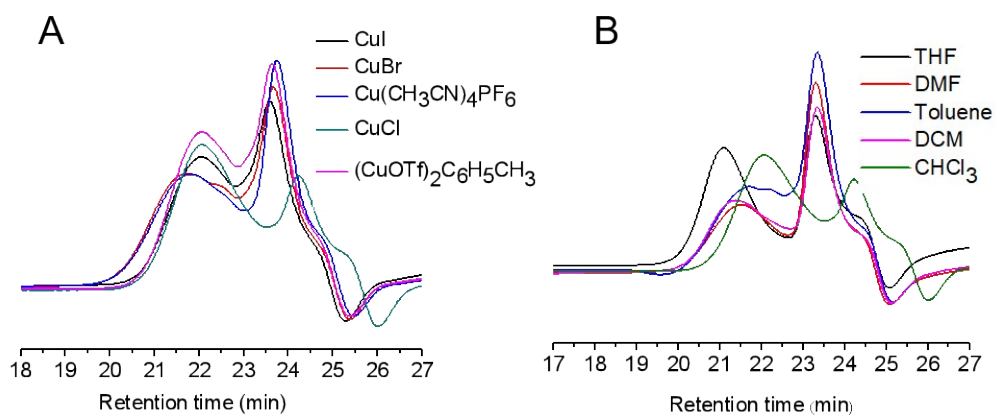

Figure S1. (A) The GPC spectra of polymers (P1) synthesized under different Cu( I ) catalysts. (B) The GPC spectra of polymers (P1) synthesized under different solvents.

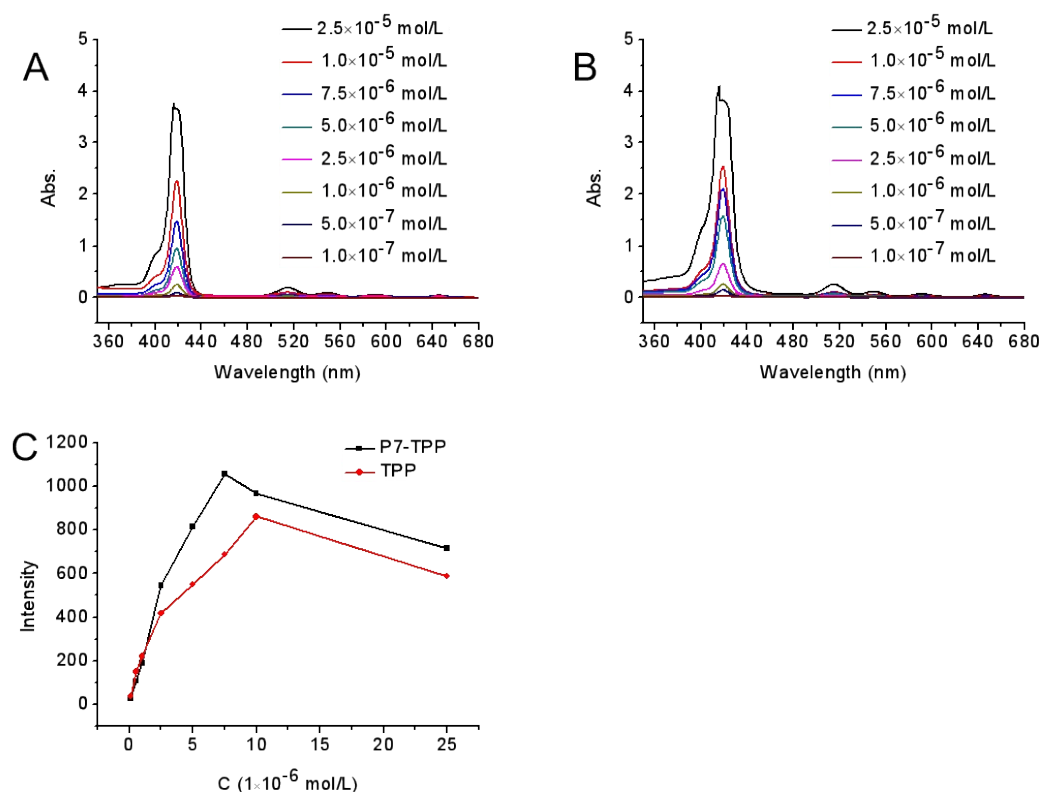

Figure S2. The UV-vis absorption spectra of TPP (A) and P7-TPP (B) at different concentrations.

(C) The fluorescence intensities of TPP and P7-TPP at different concentrations (excitation wavelength of 417 nm).

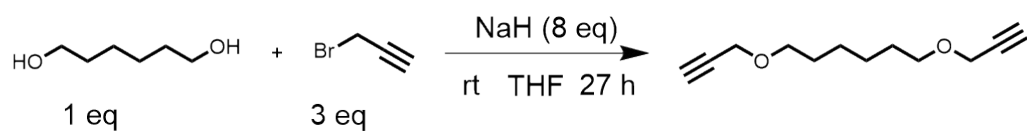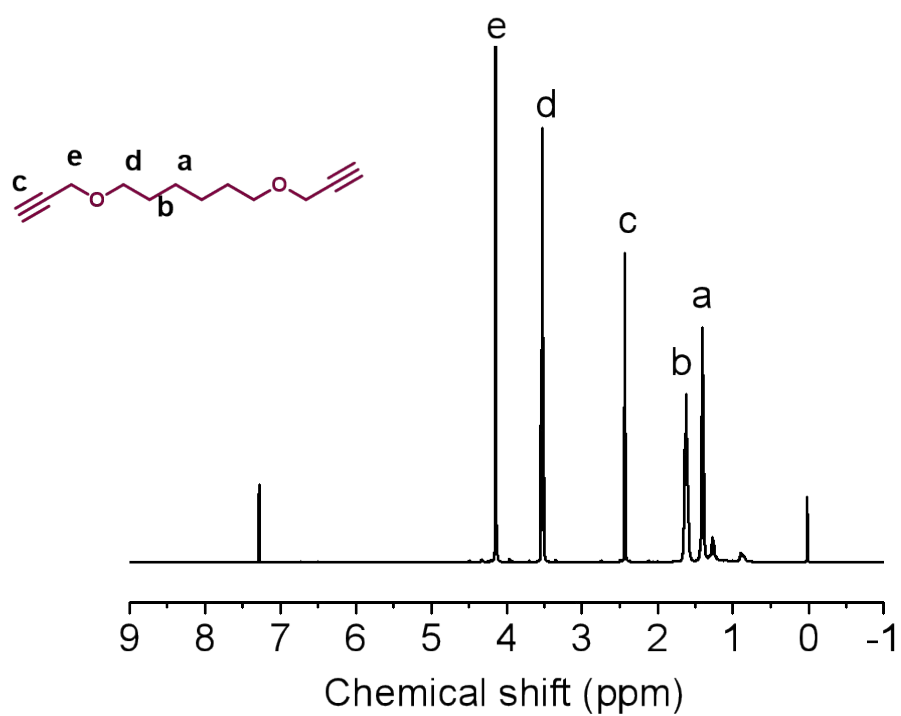

Figure S3.  $^1\text{H}$  NMR spectrum of 1b in  $\text{CDCl}_3$ .

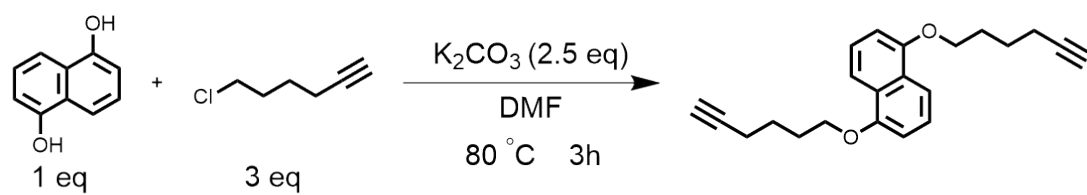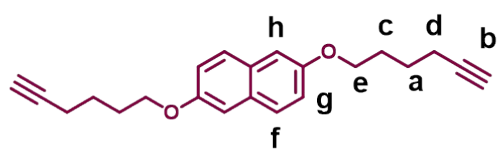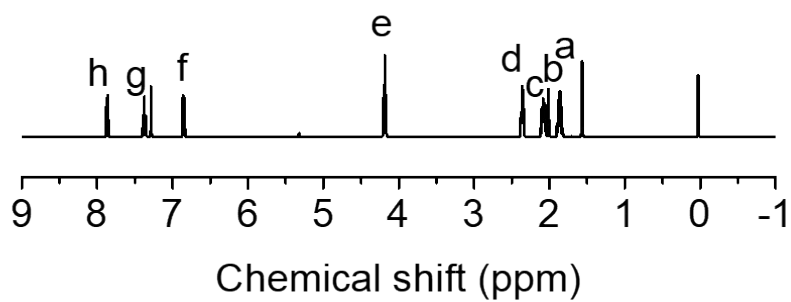

Figure S4.  $^1\text{H}$  NMR spectrum of 1d in  $\text{CDCl}_3$ .

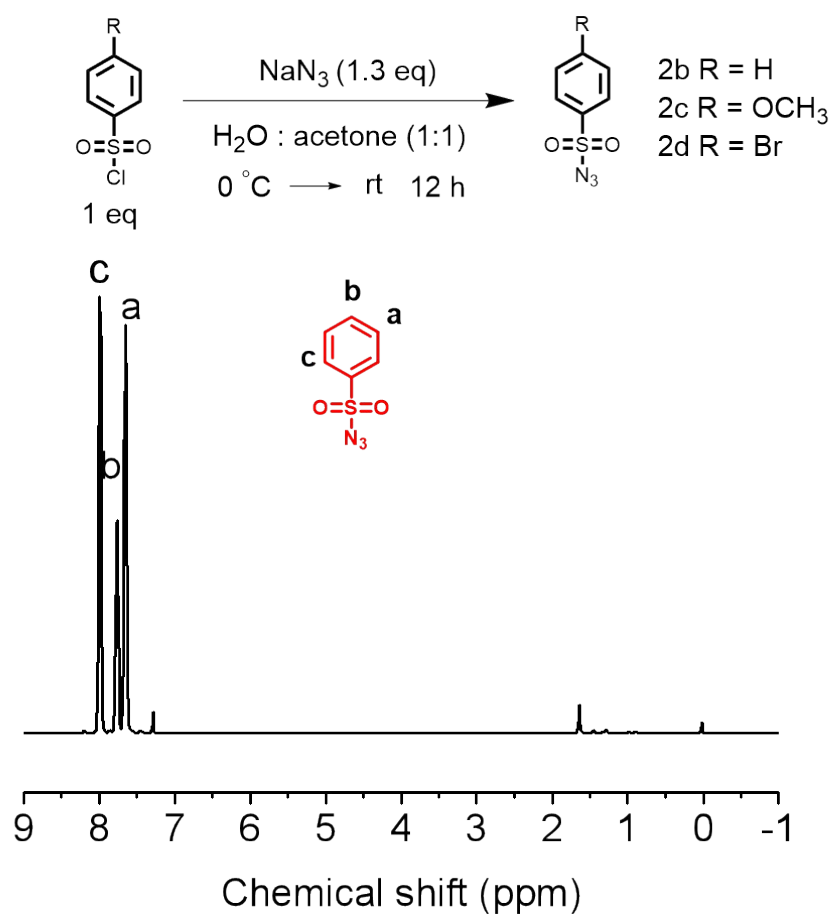

Figure S5.  $^1\text{H}$  NMR spectrum of 2b in  $\text{CDCl}_3$ .

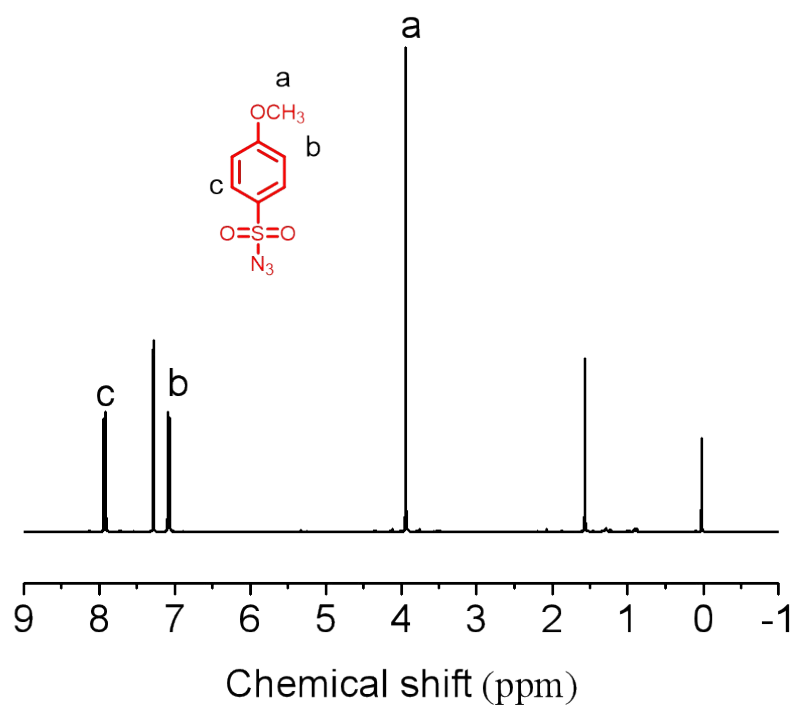

Figure S6.  $^1\text{H}$  NMR spectrum of **2c** in  $\text{CDCl}_3$ .

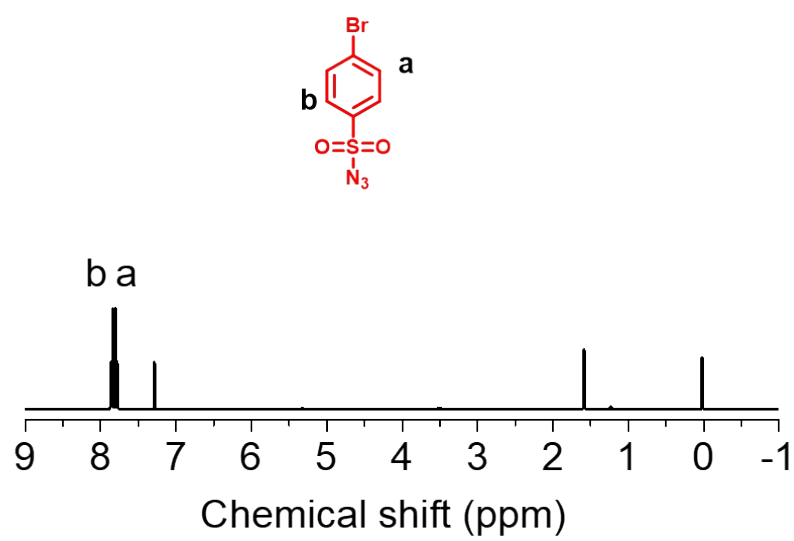

Figure S7. <sup>1</sup>H NMR spectrum of 2d in CDCl<sub>3</sub>.



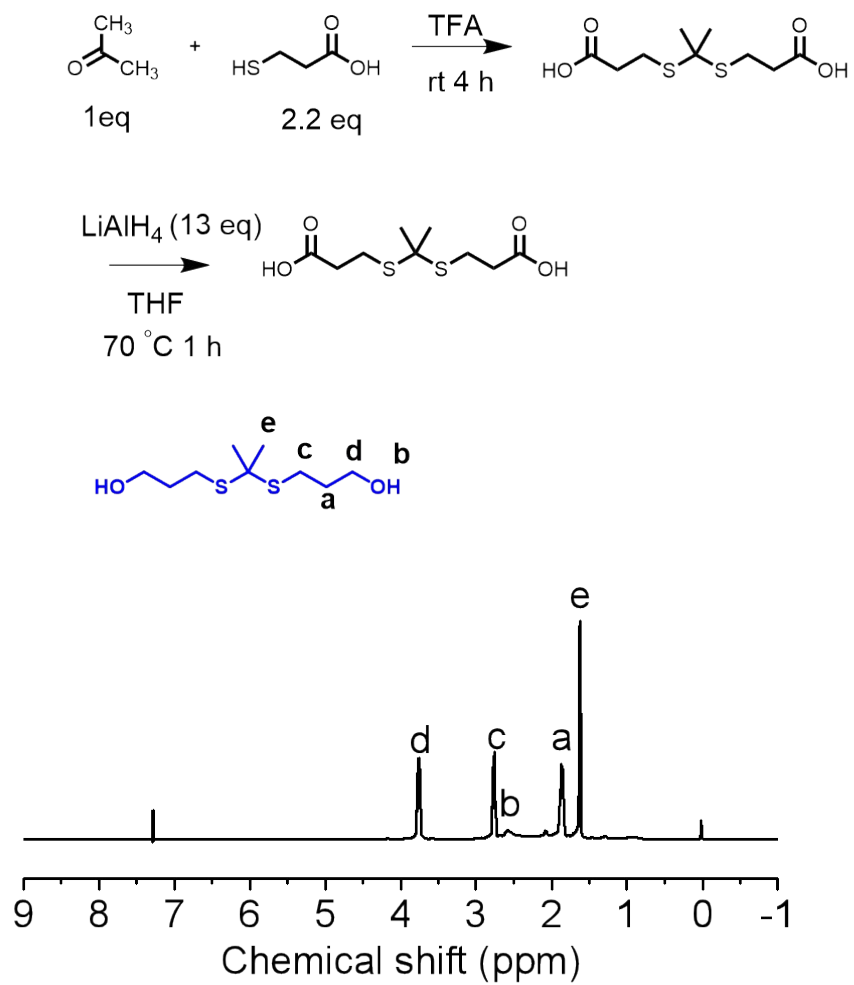

Figure S8.  $^1\text{H}$  NMR spectrum of 3a in  $\text{CDCl}_3$ .

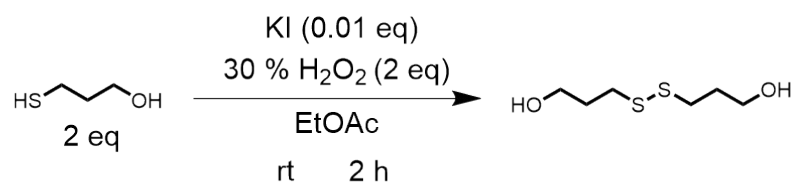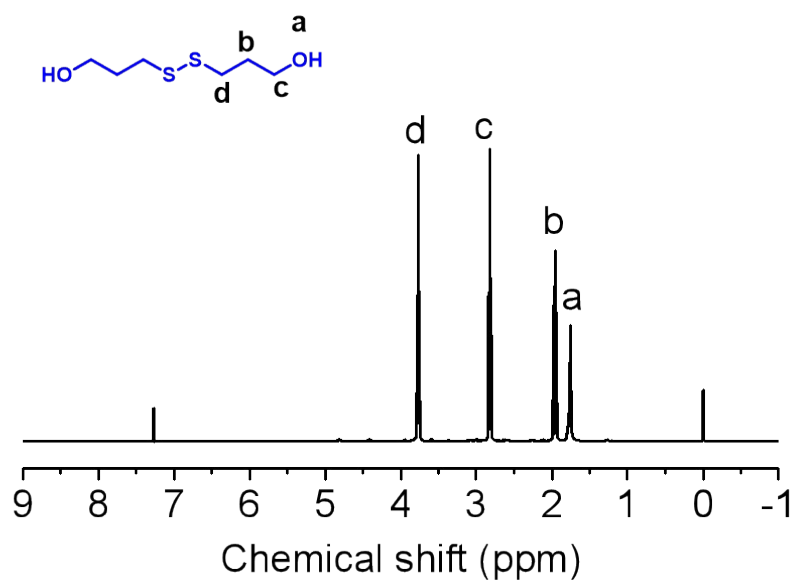

Figure S9.  $^1\text{H}$  NMR spectrum of **3b** in  $d$ -DMSO.

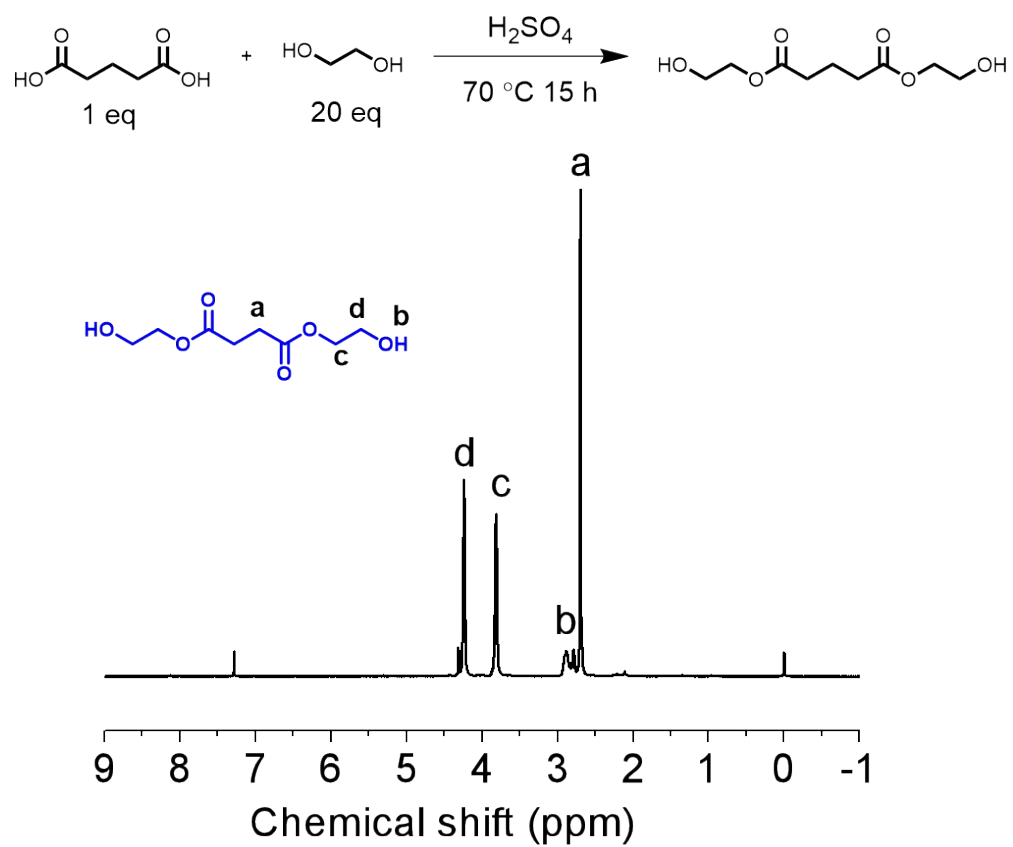

Figure S10.  $^1\text{H}$  NMR spectrum of 3c in  $\text{CDCl}_3$ .

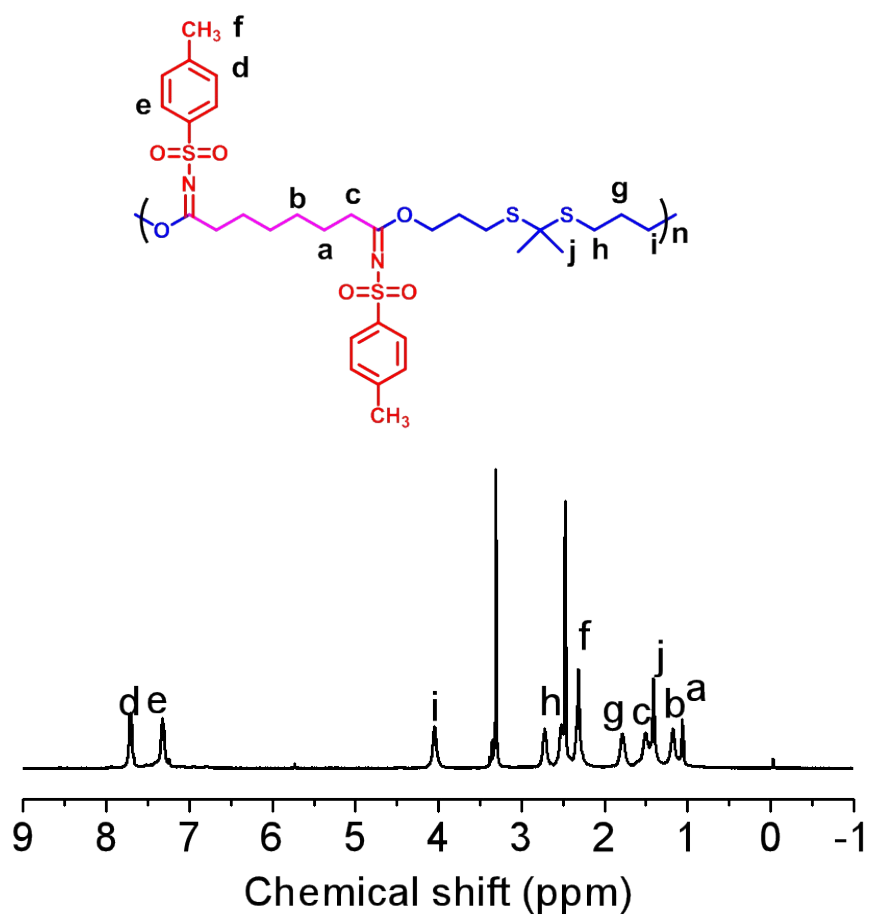

Figure S11.  $^1\text{H}$  NMR spectrum of P1 (P1a/2a/3a) in *d*-DMSO.

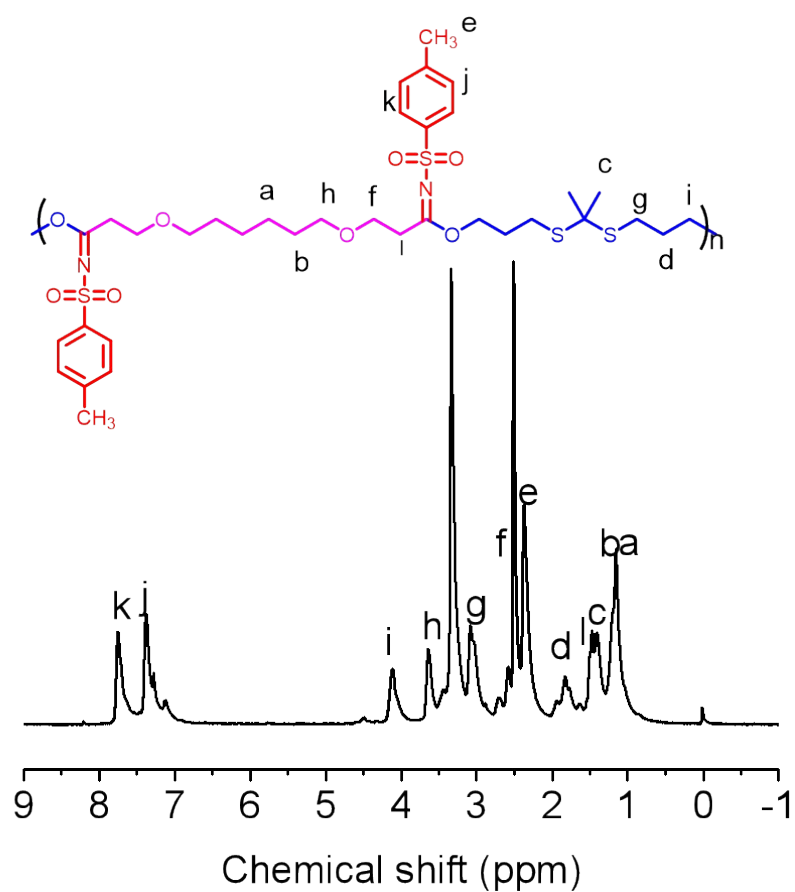

Figure S12.  $^1\text{H}$  NMR spectrum of P2 (P1b/2a/3a) in  $d$ -DMSO.

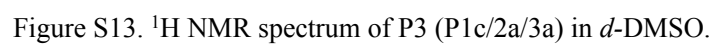

Figure S13. <sup>1</sup>H NMR spectrum of P3 (P1c/2a/3a) in *d*-DMSO.

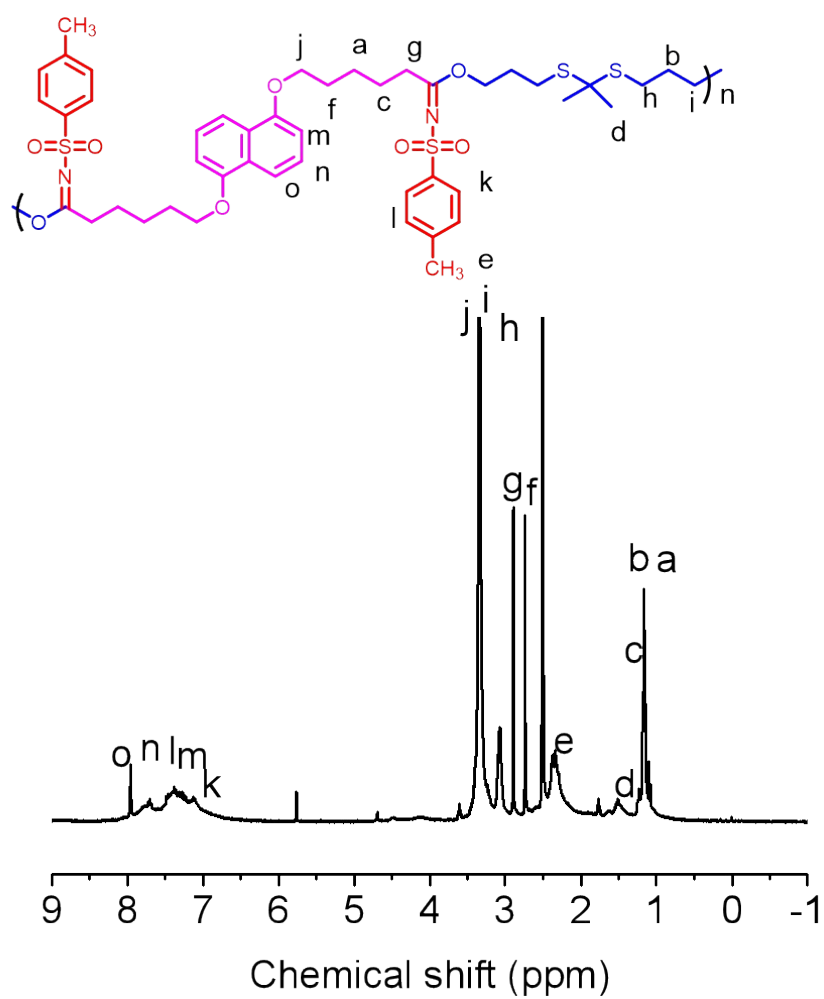

Figure S14.  $^1\text{H}$  NMR spectrum of P4 (P1d/2a/3a) in  $d$ -DMSO.

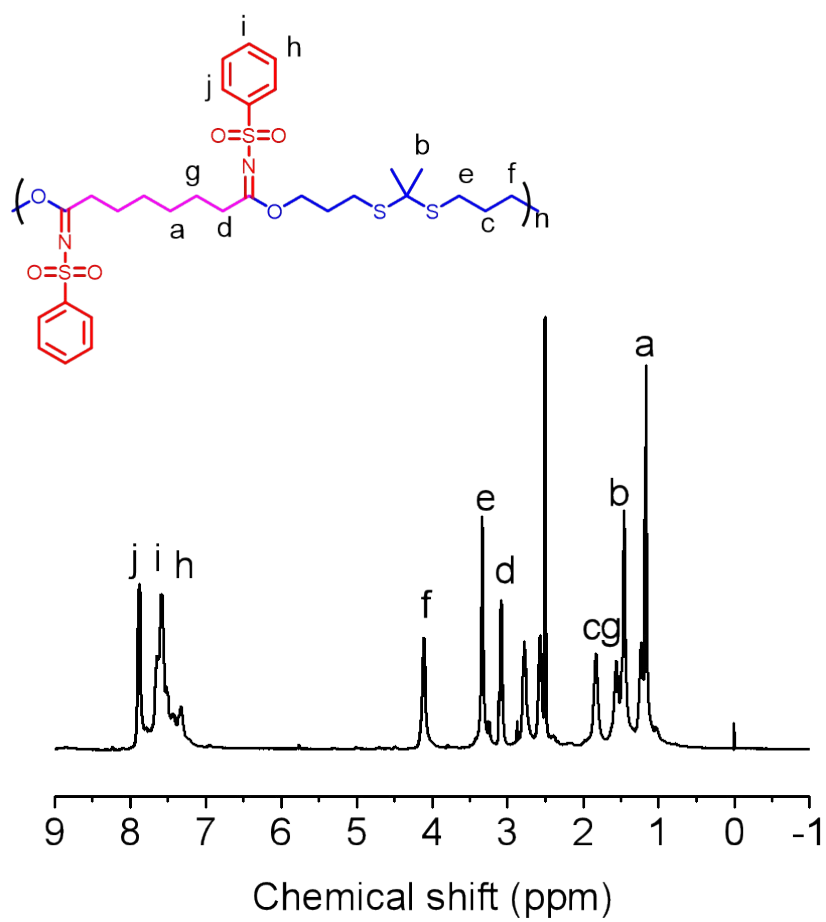

Figure S15.  $^1\text{H}$  NMR spectrum of P5 (P1a/2b/3a) in  $d$ -DMSO.



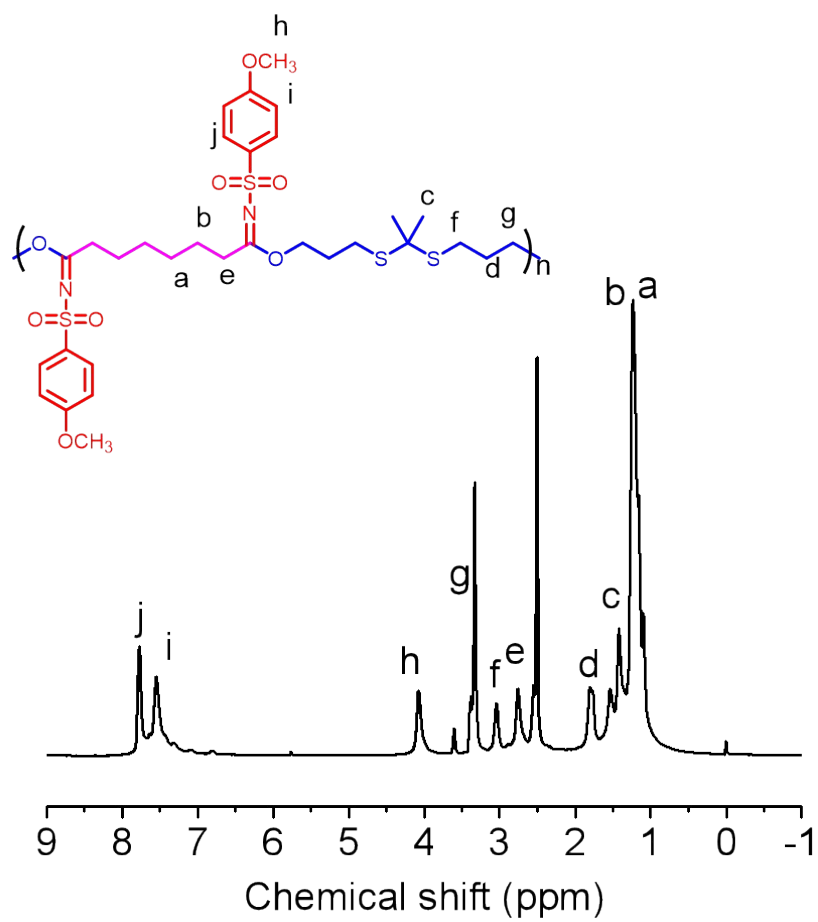

Figure S16.  $^1\text{H}$  NMR spectrum of P6 (P1a/2c/3a) in  $d$ -DMSO.

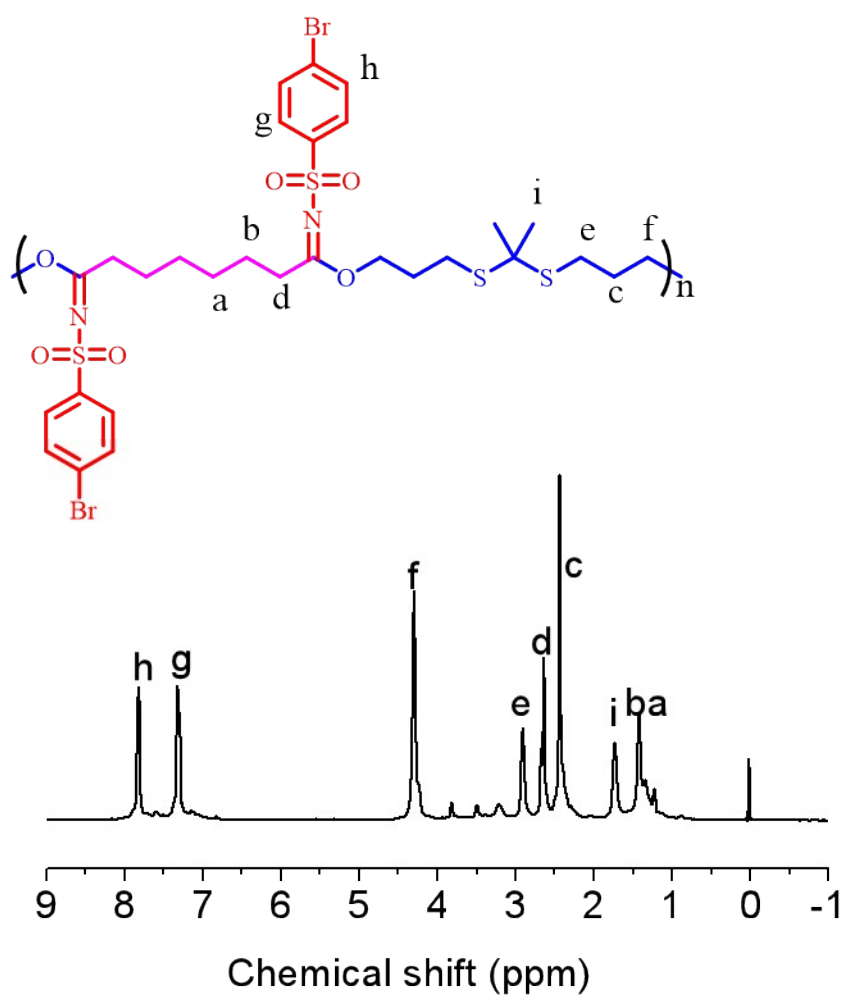

Figure S17.  $^1\text{H}$  NMR spectrum of P7 (P1a/2d/3a) in *d*-DMSO.

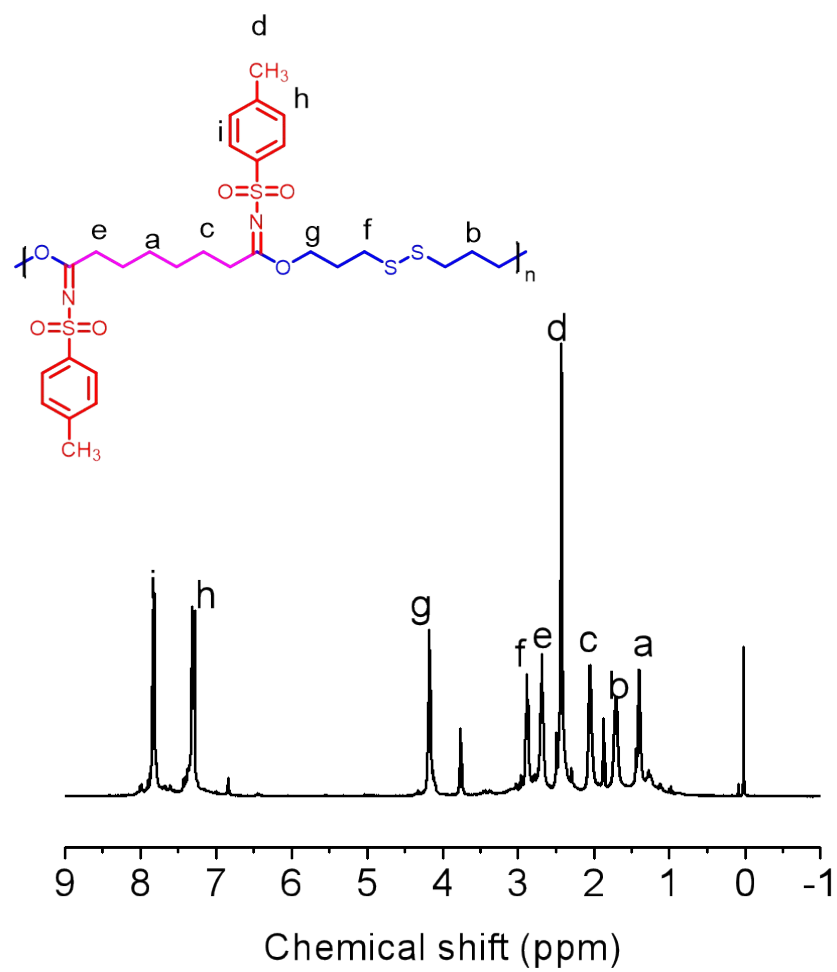

Figure S18.  $^1\text{H}$  NMR spectrum of P8 (P1a/2a/3b) in *d*-DMSO.

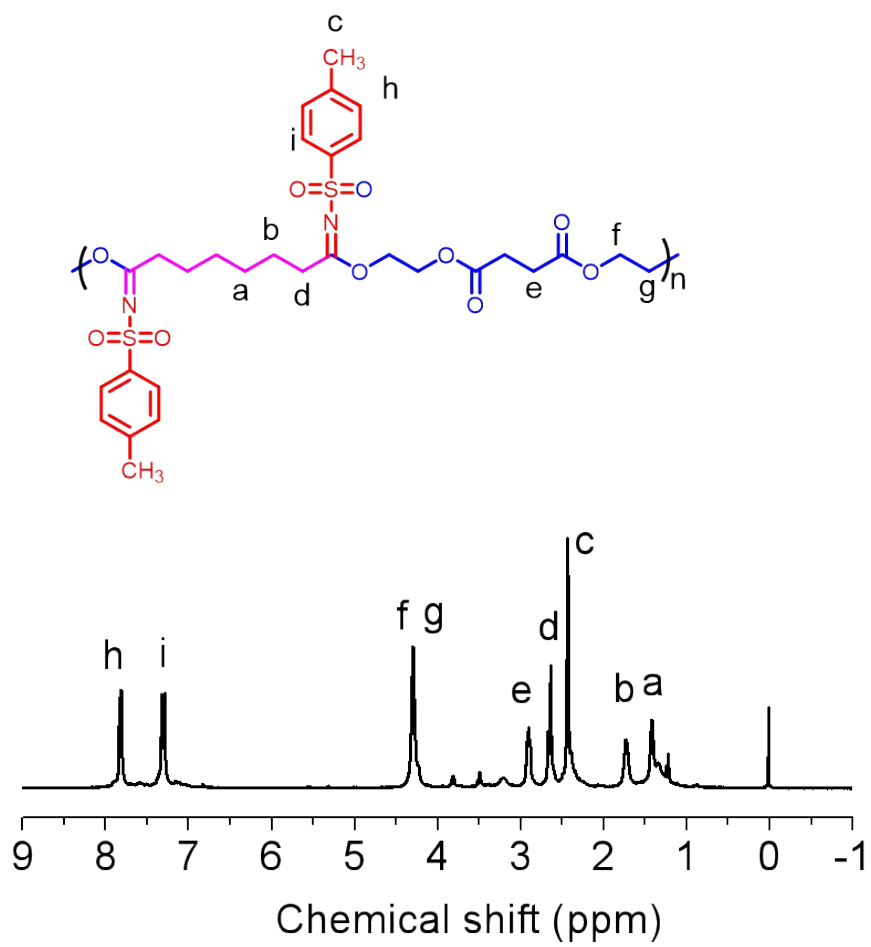

Figure S19.  $^1\text{H}$  NMR spectrum of P9 (P1a/2a/3c) in  $d$ -DMSO.

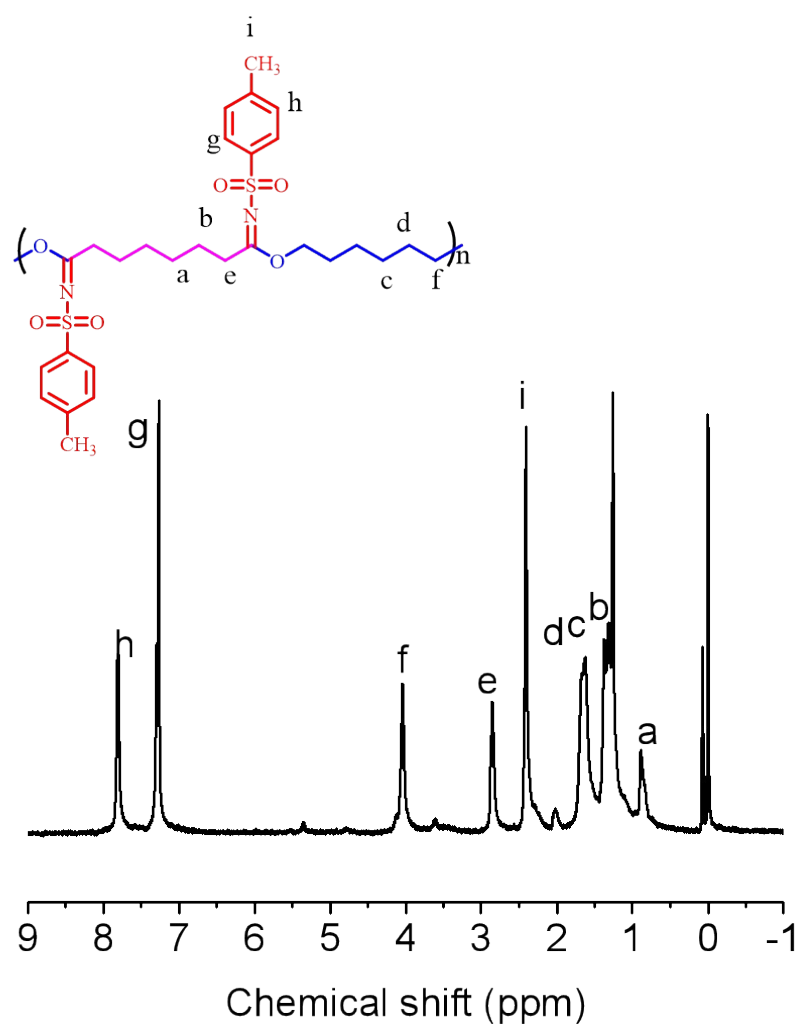

Figure S20.  $^1\text{H}$  NMR spectrum of P10 (P1a/2a/3d) in *d*-DMSO.

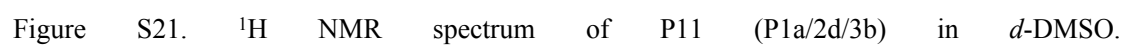

Figure S21. <sup>1</sup>H NMR spectrum of P11 (P1a/2d/3b) in *d*-DMSO.

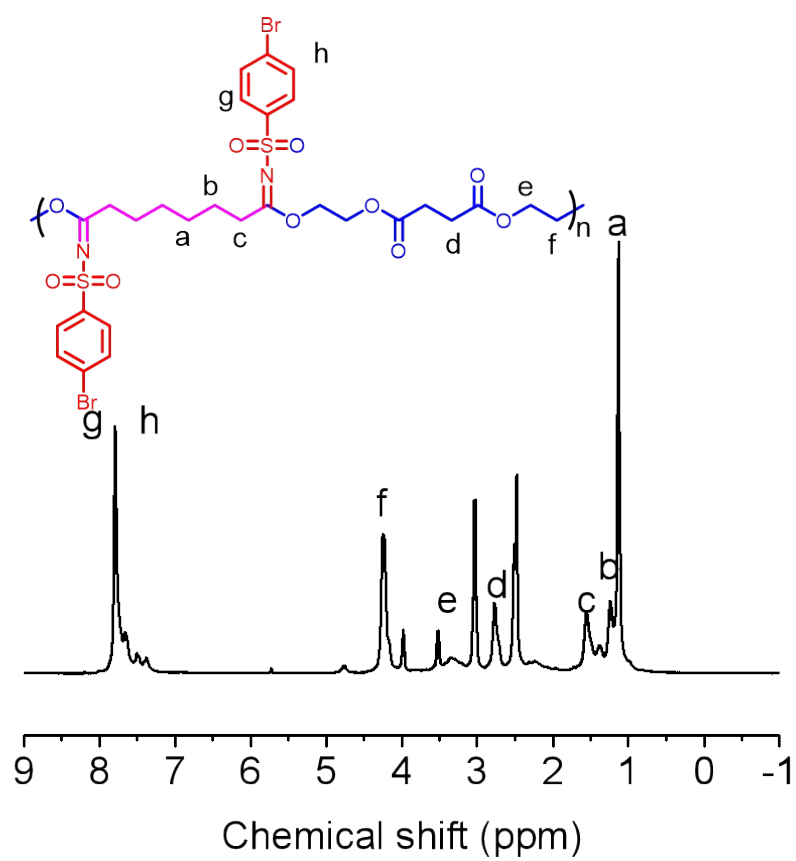

Figure S22.  $^1\text{H}$  NMR spectrum of P12 (P1a/2d/3c) in  $d$ -DMSO.

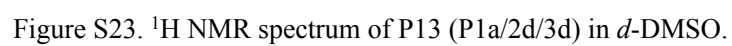



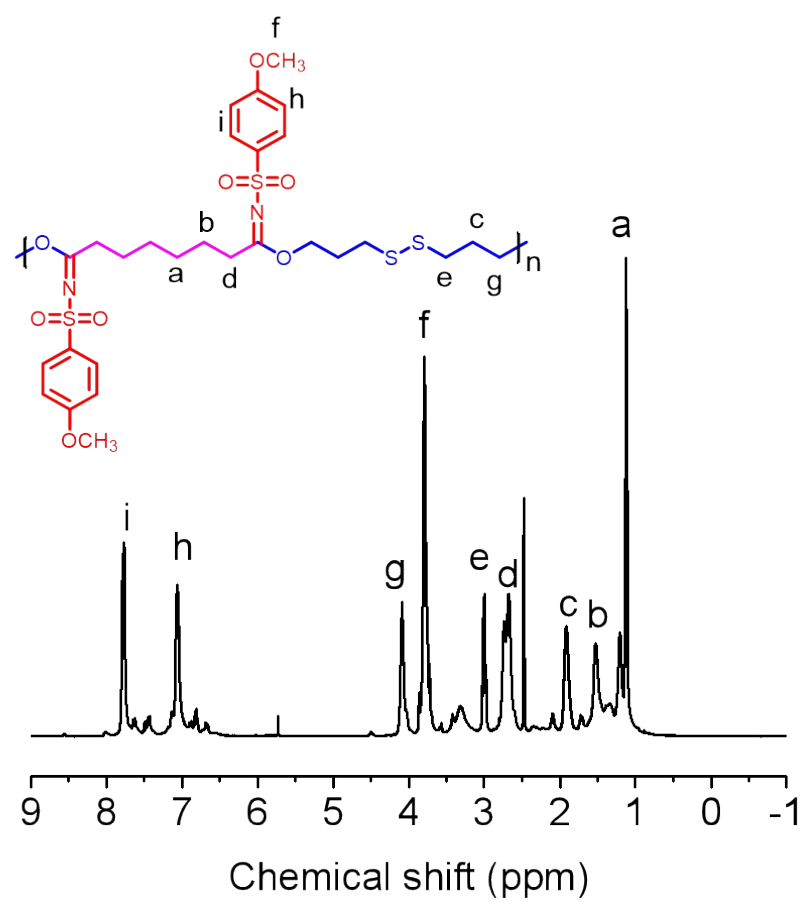

Figure S24.  $^1\text{H}$  NMR spectrum of P14 (P1a/2c/3b) in  $d$ -DMSO.

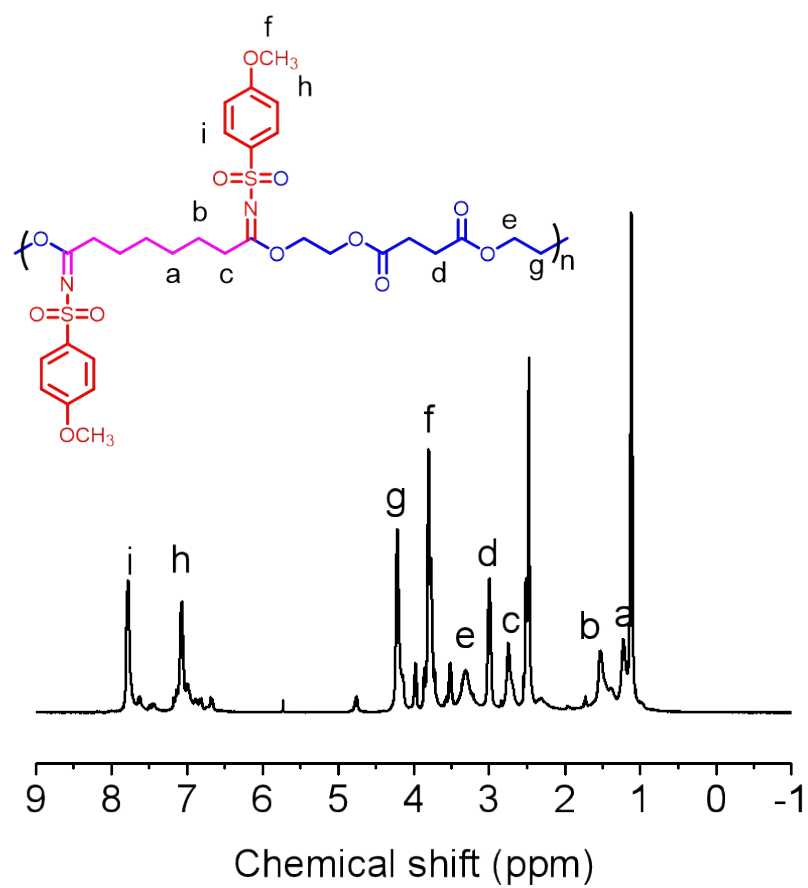

Figure S25.  $^1\text{H}$  NMR spectrum of P15 (P1a/2c/3c) in *d*-DMSO.

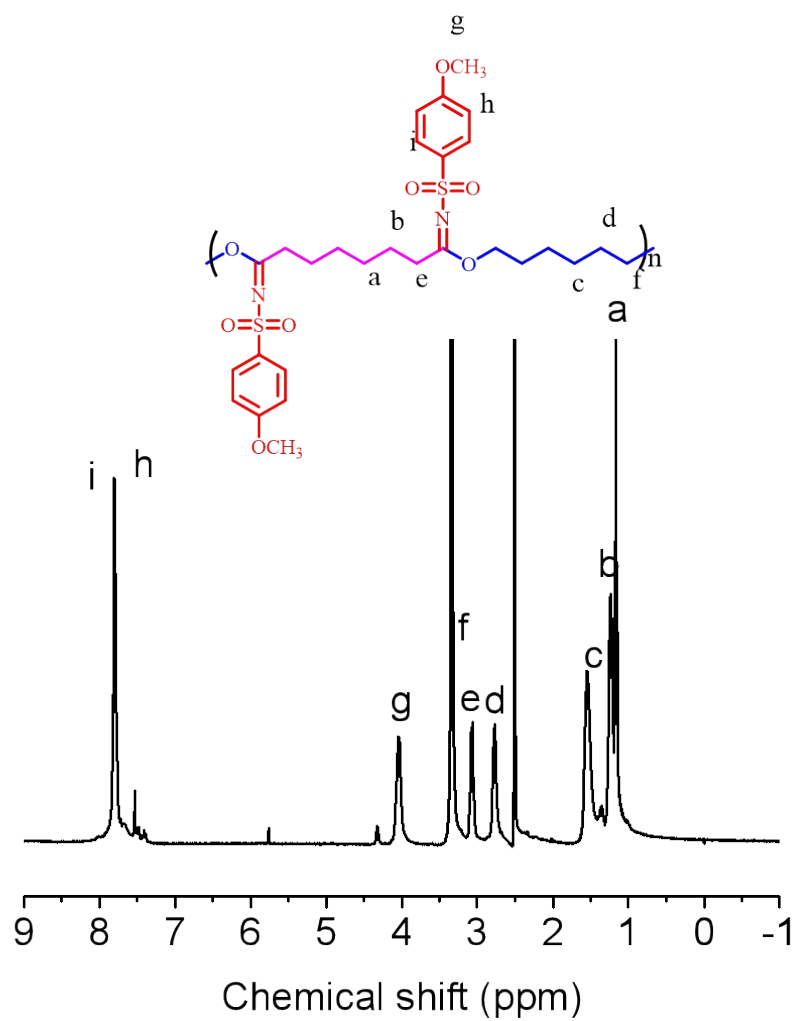

Figure S26.  $^1\text{H}$  NMR spectrum of P16 (P1a/2c/3d) in  $d$ -DMSO.

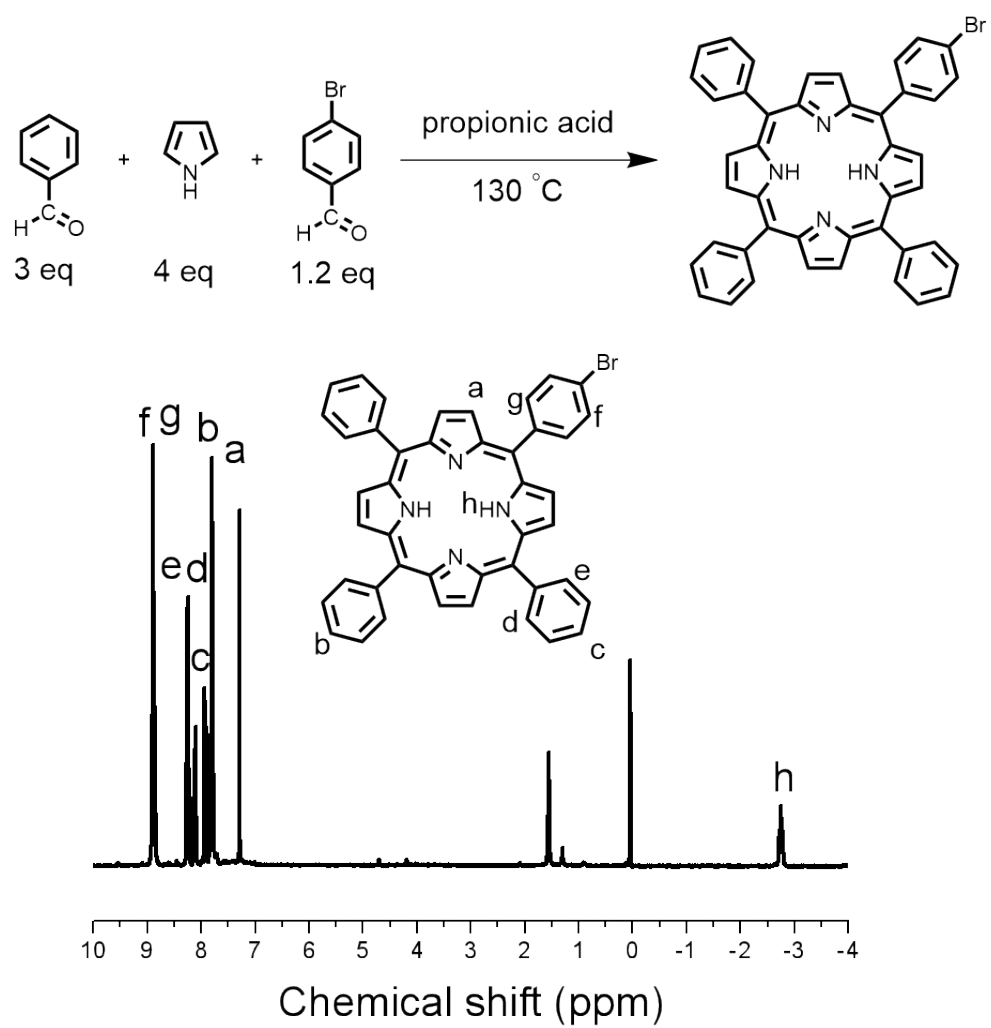

Figure S27. <sup>1</sup>H NMR spectrum of TPP-Br in CDCl<sub>3</sub>.

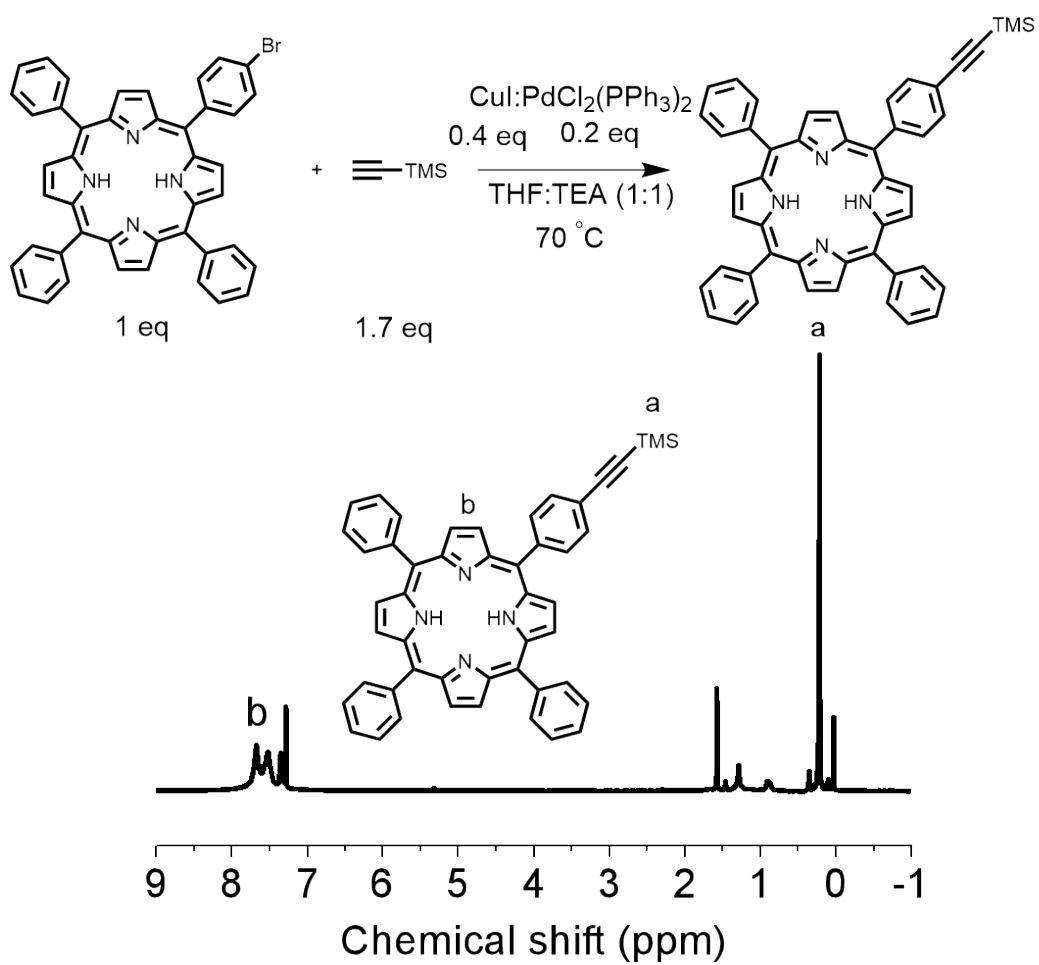

Figure S28.  $^1\text{H}$  NMR spectrum of TPP-yne-TMS in  $\text{CDCl}_3$ .

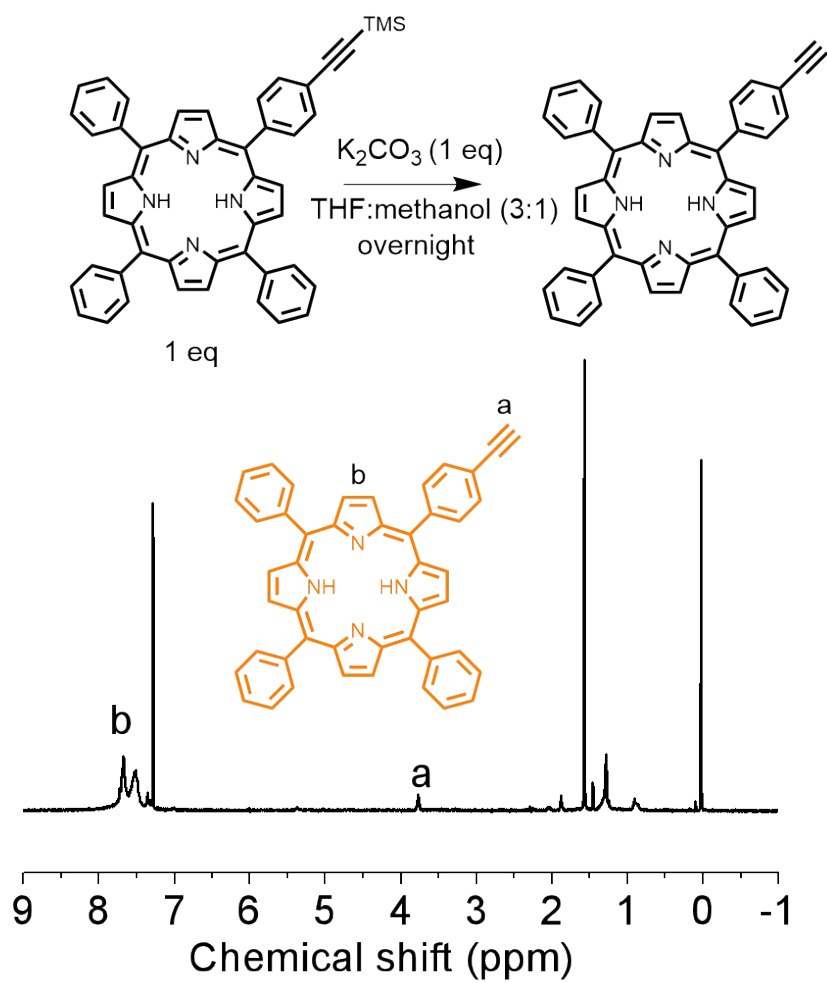

Figure S29.  $^1H$  NMR spectrum of TPP-yne in  $CDCl_3$ .

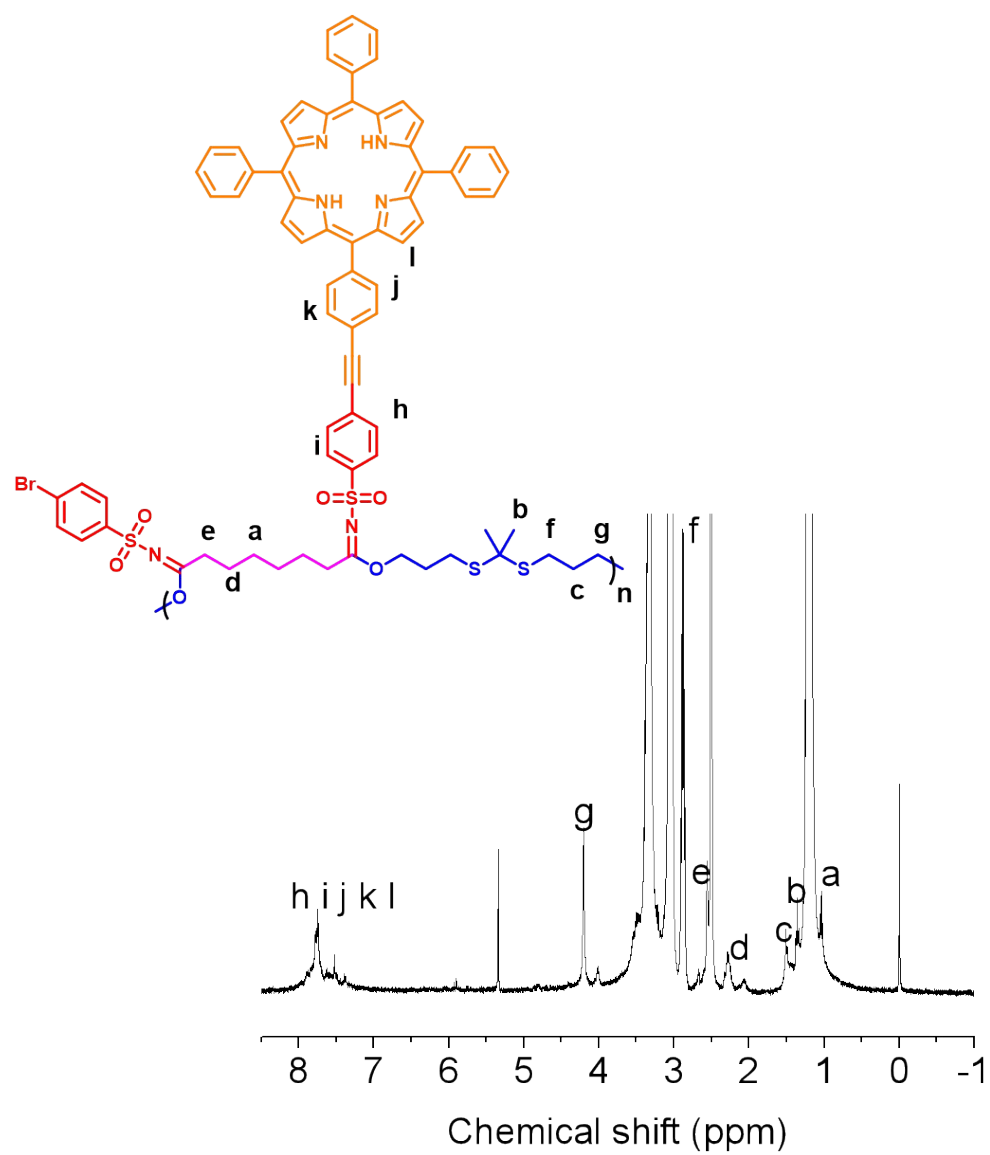

Figure S30.  $^1\text{H}$  NMR spectrum of P7-TPP synthesized by one-pot, four-component, tandem polymerization in  $d$ -DMSO.

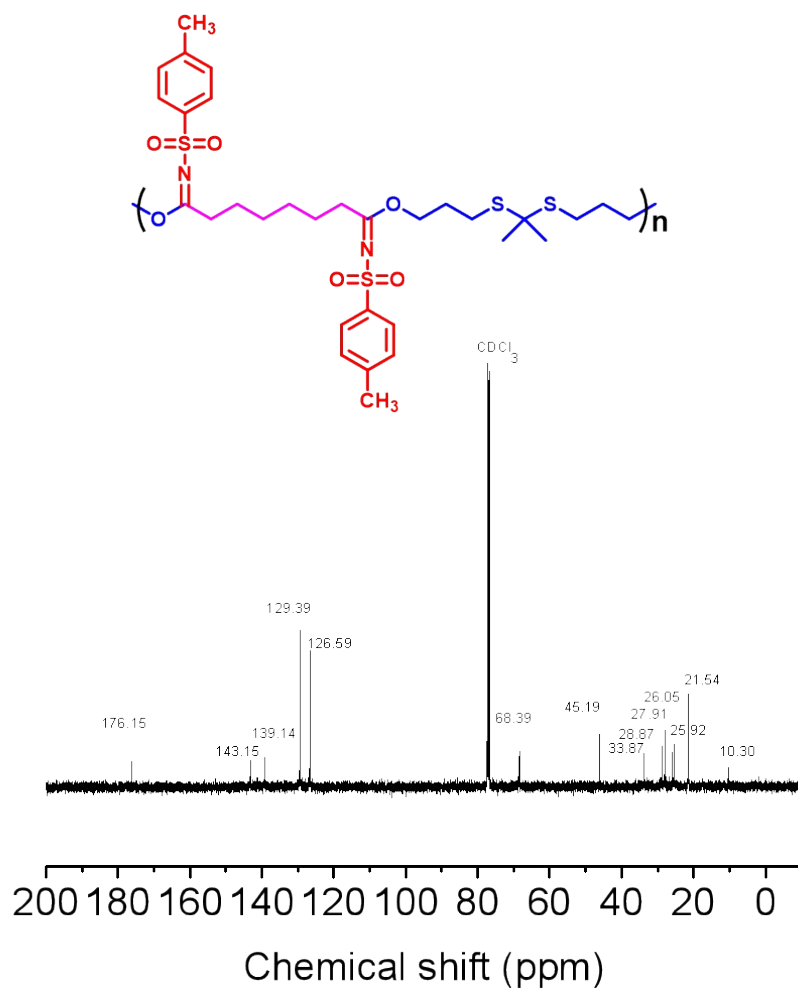

Figure S31.  $^{13}\text{C}$  NMR spectrum of P1 (P1a/2a/3a) in  $\text{CDCl}_3$ .



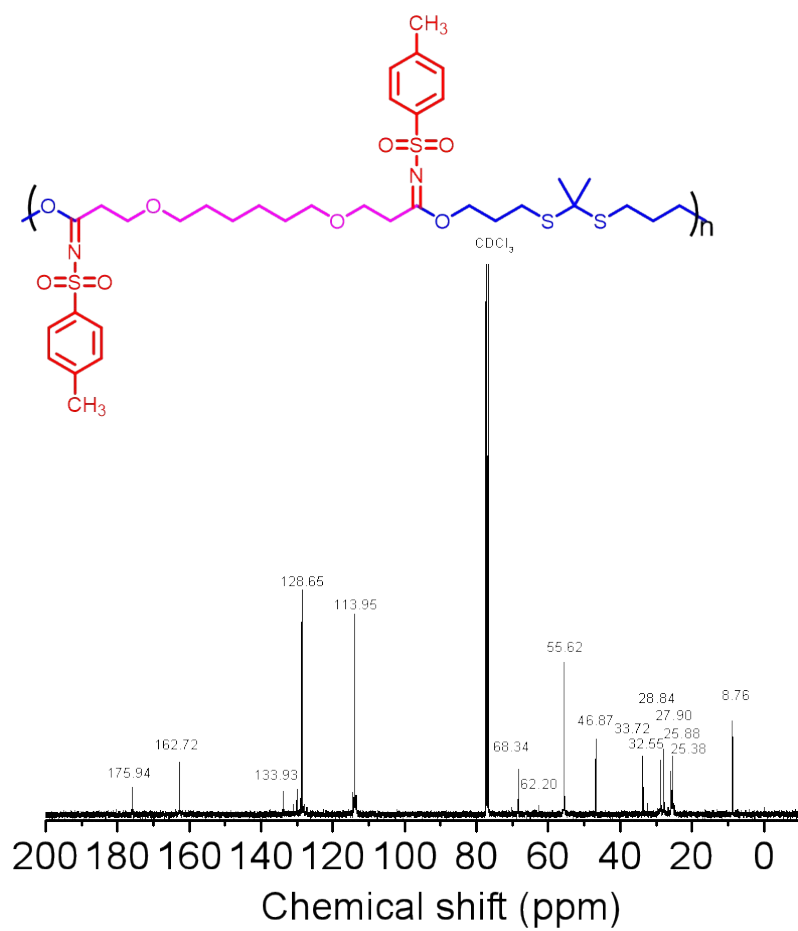

Figure S32.  $^{13}\text{C}$  NMR spectrum of P2 (P1b/2a/3a) in  $\text{CDCl}_3$ .

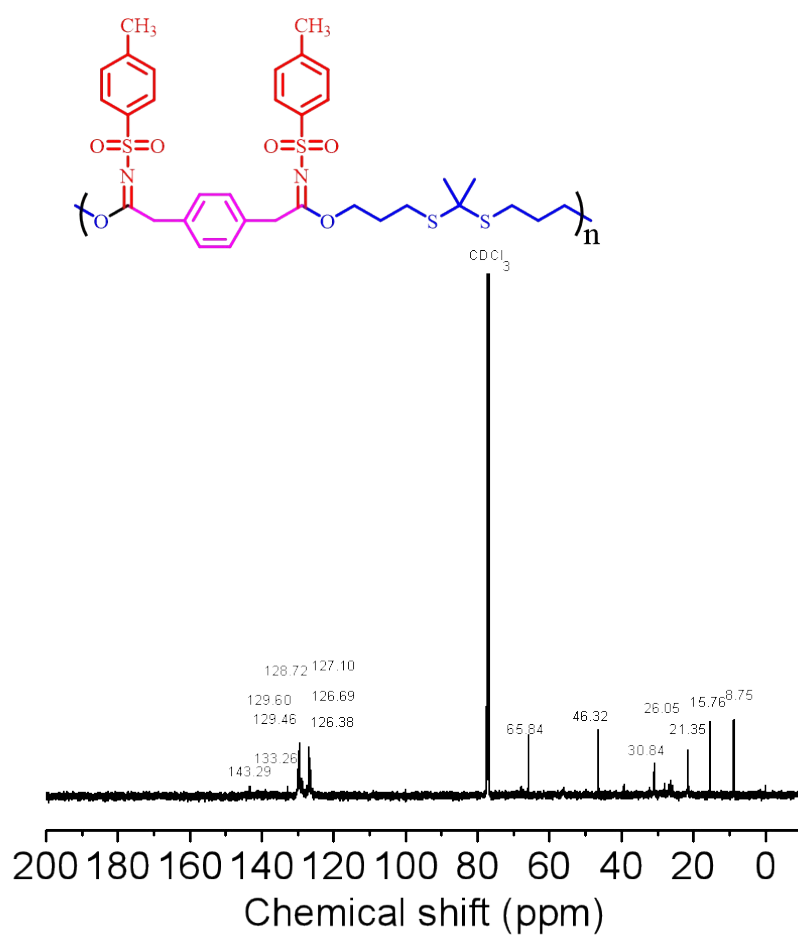

Figure S33.  $^{13}\text{C}$  NMR spectrum of P3 (P1c/2a/3a) in  $\text{CDCl}_3$ .

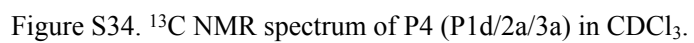

Figure S34.  $^{13}\text{C}$  NMR spectrum of P4 (P1d/2a/3a) in  $\text{CDCl}_3$ .

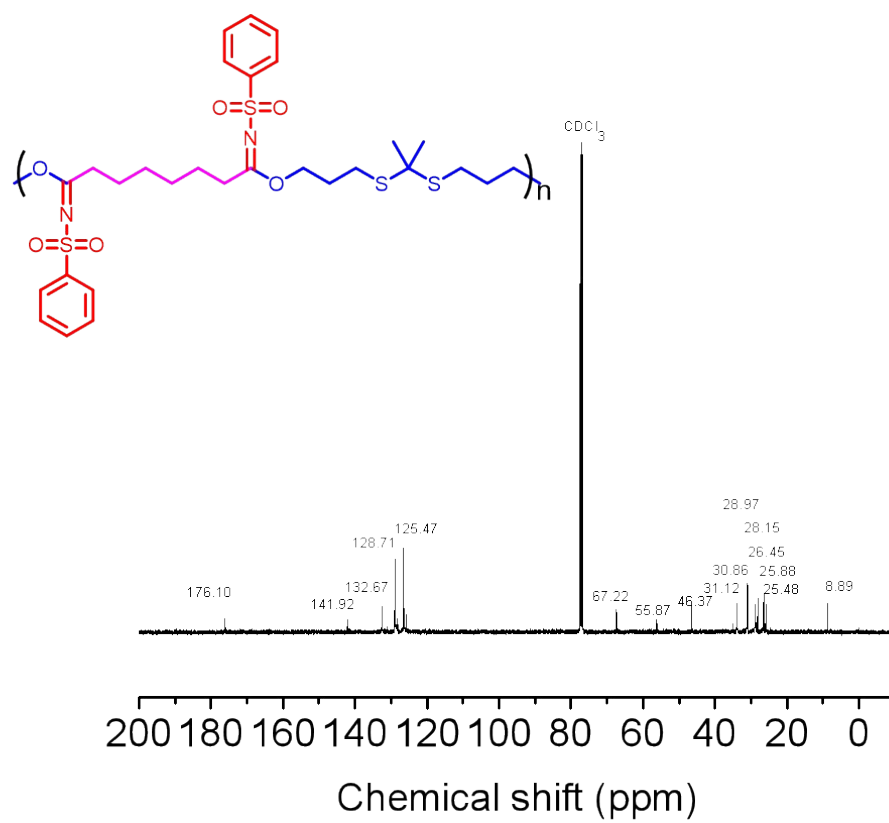

Figure S35.  $^{13}\text{C}$  NMR spectrum of P5 (P1a/2b/3a) in  $\text{CDCl}_3$ .

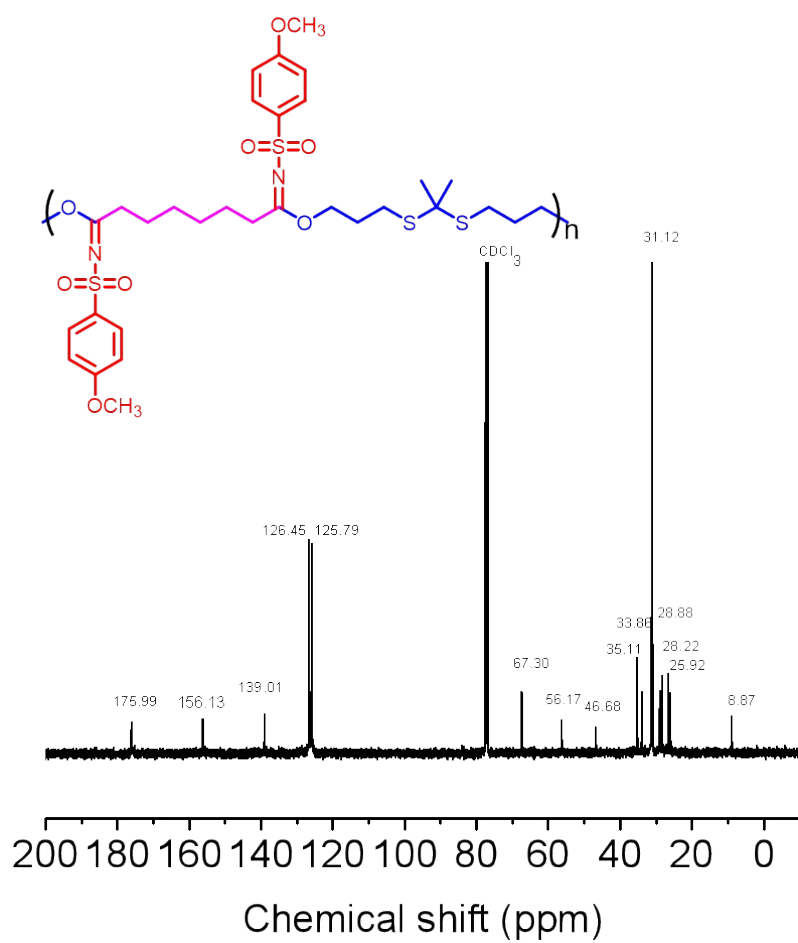

Figure S36.  $^{13}\text{C}$  NMR spectrum of P6 (P1a/2c/3a) in  $\text{CDCl}_3$ .

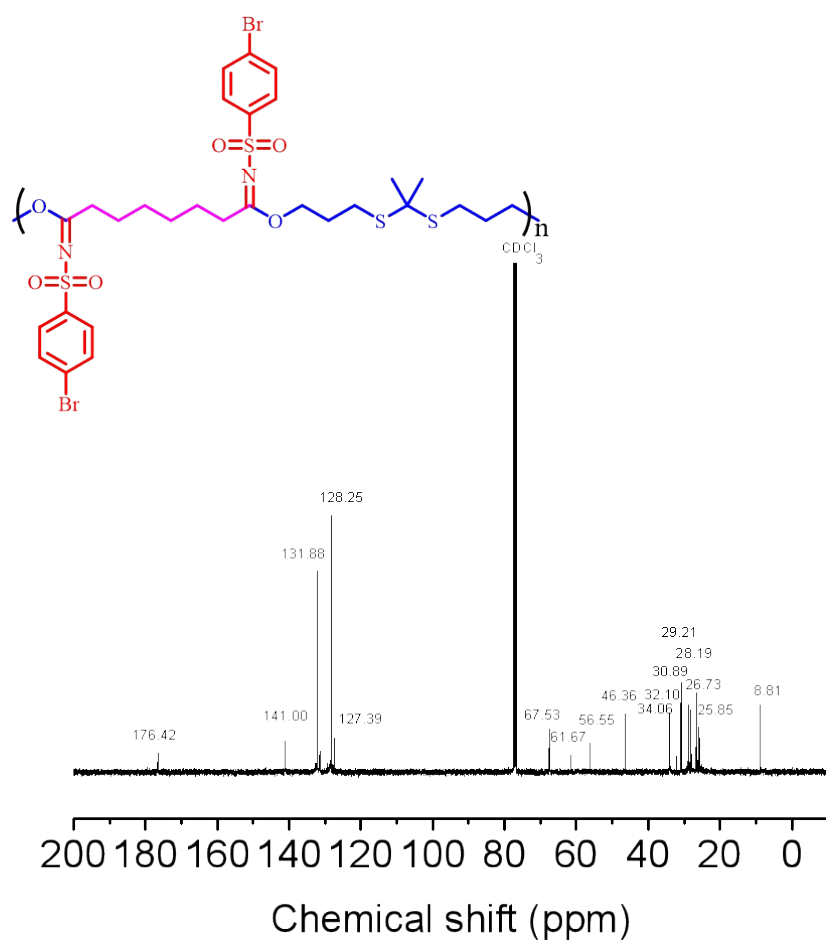

Figure S37.  $^{13}\text{C}$  NMR spectrum of P7 (P1a/2d/3a) in  $\text{CDCl}_3$ .

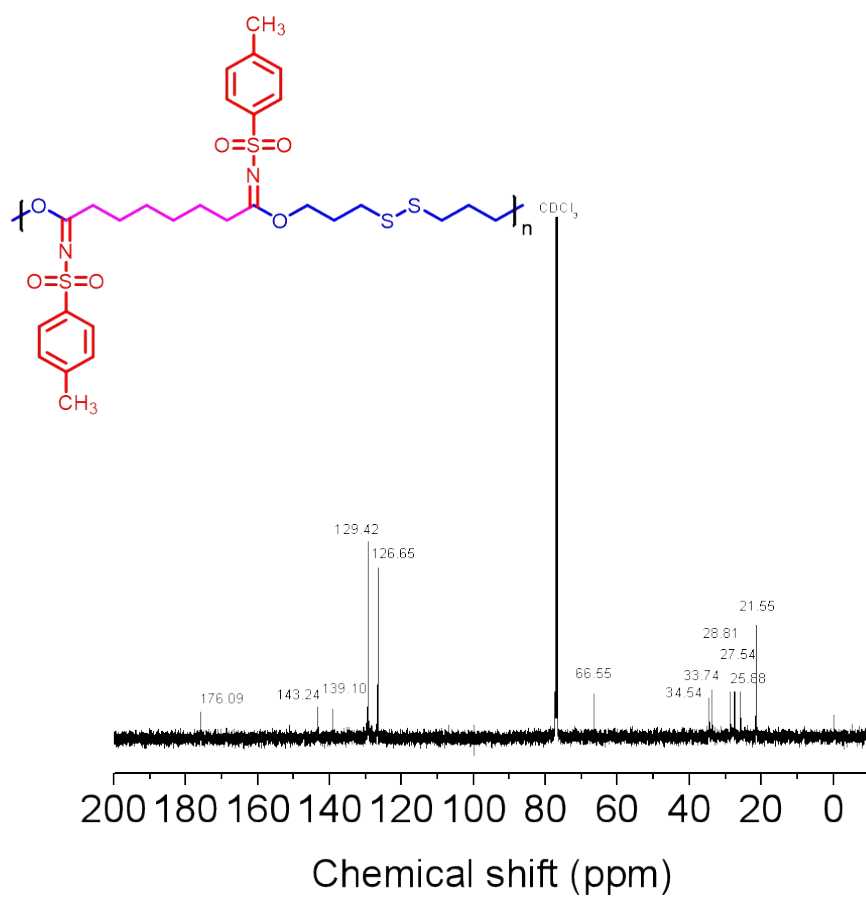

Figure S38.  $^{13}\text{C}$  NMR spectrum of P8 (P1a/2a/3b) in  $\text{CDCl}_3$ .

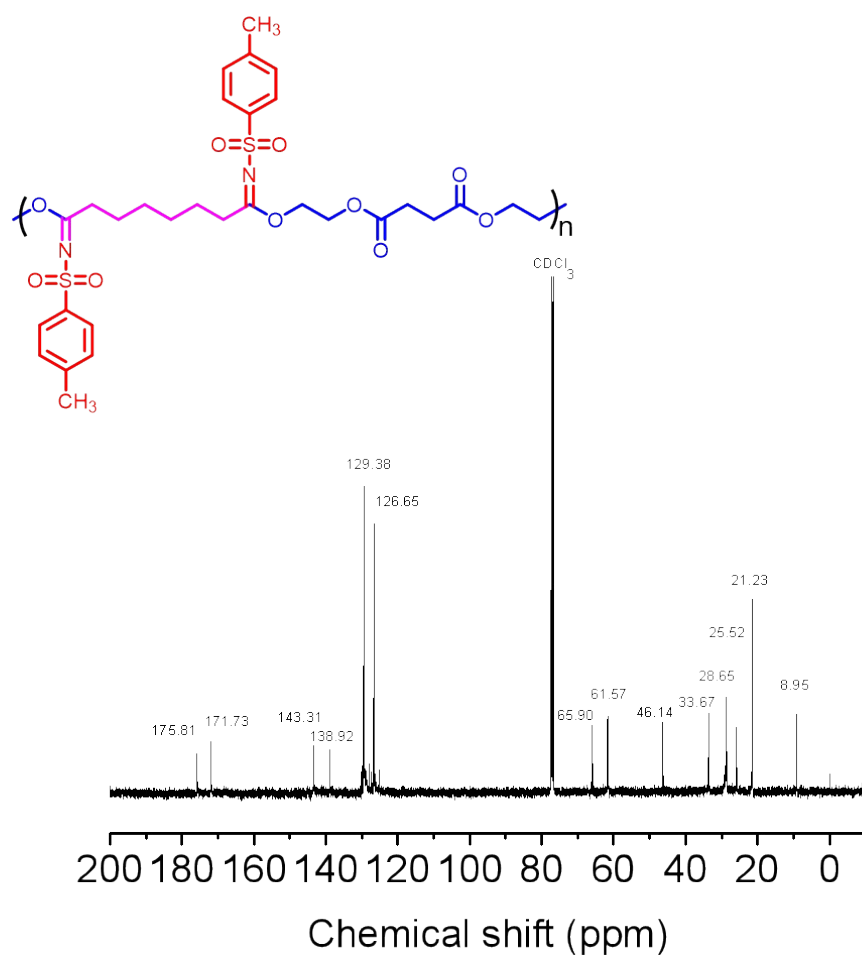

Figure S39.  $^{13}\text{C}$  NMR spectrum of P9 (P1a/2a/3c) in  $\text{CDCl}_3$ .



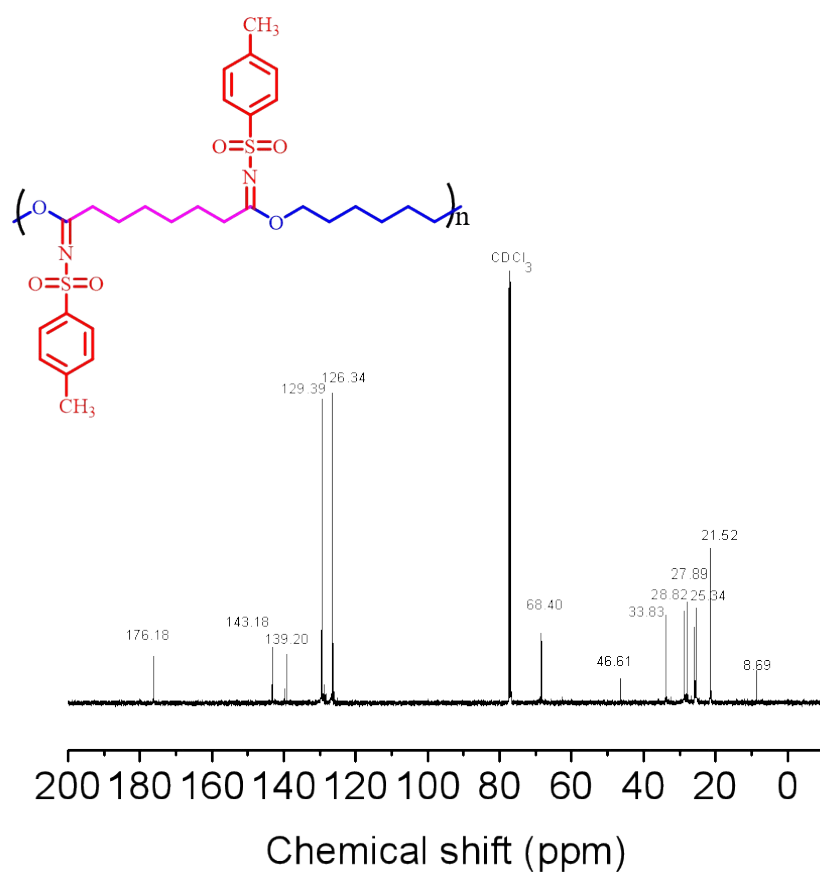

Figure S40.  $^{13}\text{C}$  NMR spectrum of P10 (P1a/2a/3d) in  $\text{CDCl}_3$ .

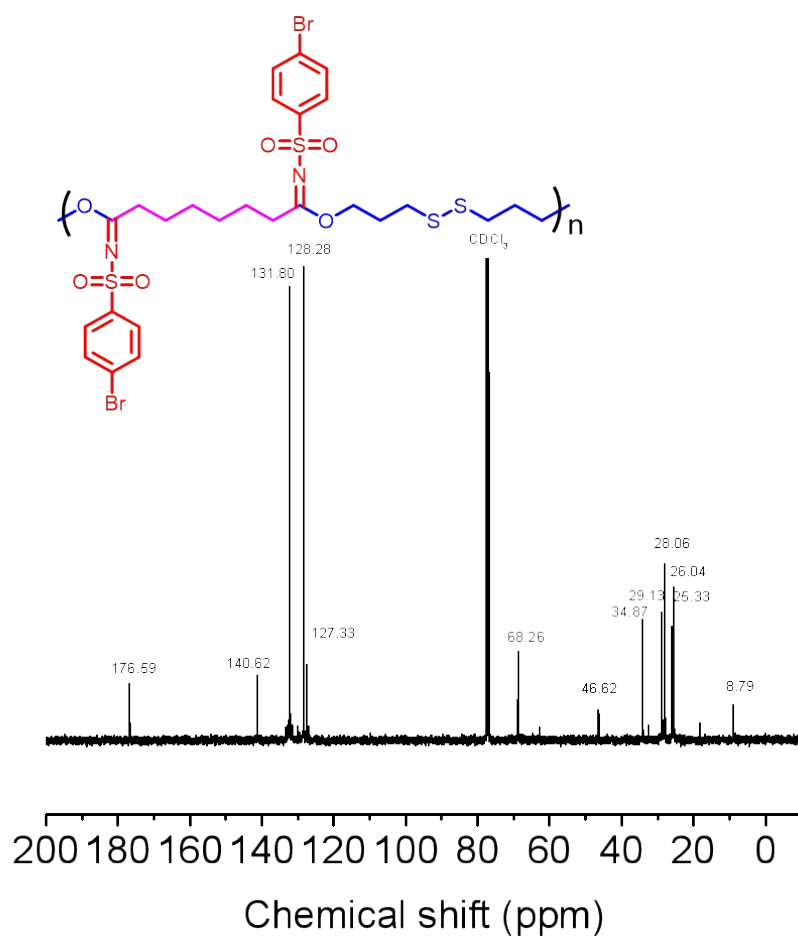

Figure S41.  $^{13}\text{C}$  NMR spectrum of P11 (P1a/2d/3b) in  $\text{CDCl}_3$ .

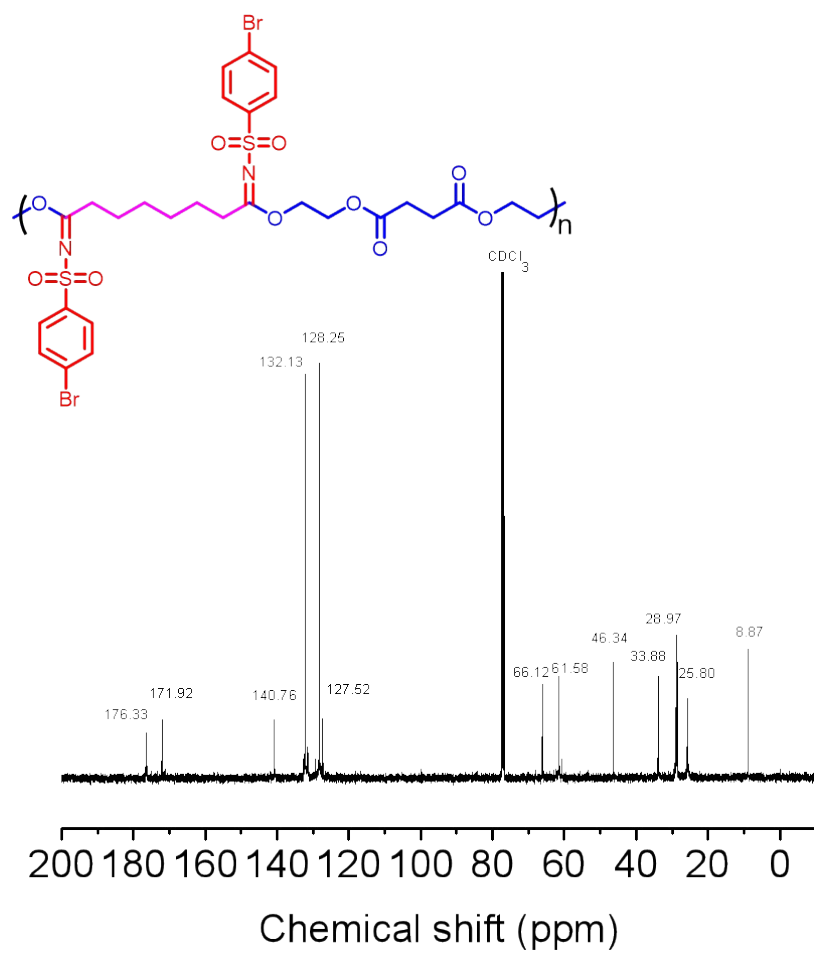

Figure S42.  $^{13}\text{C}$  NMR spectrum of P12 (P1a/2d/3c) in  $\text{CDCl}_3$ .

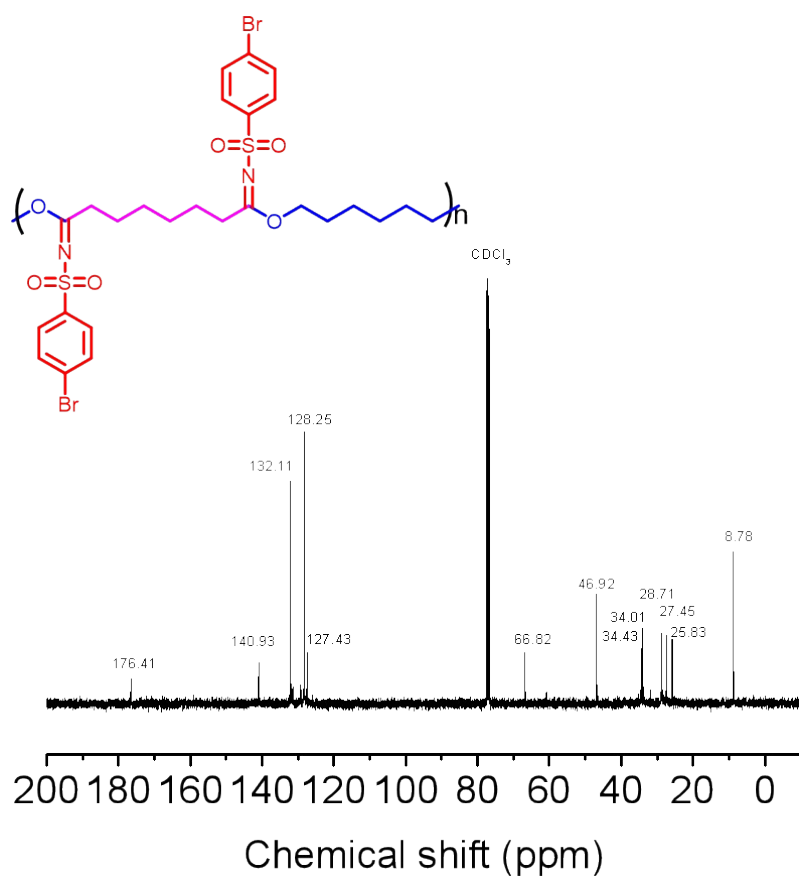

Figure S43.  $^{13}\text{C}$  NMR spectrum of P13 (P1a/2d/3d) in  $\text{CDCl}_3$ .

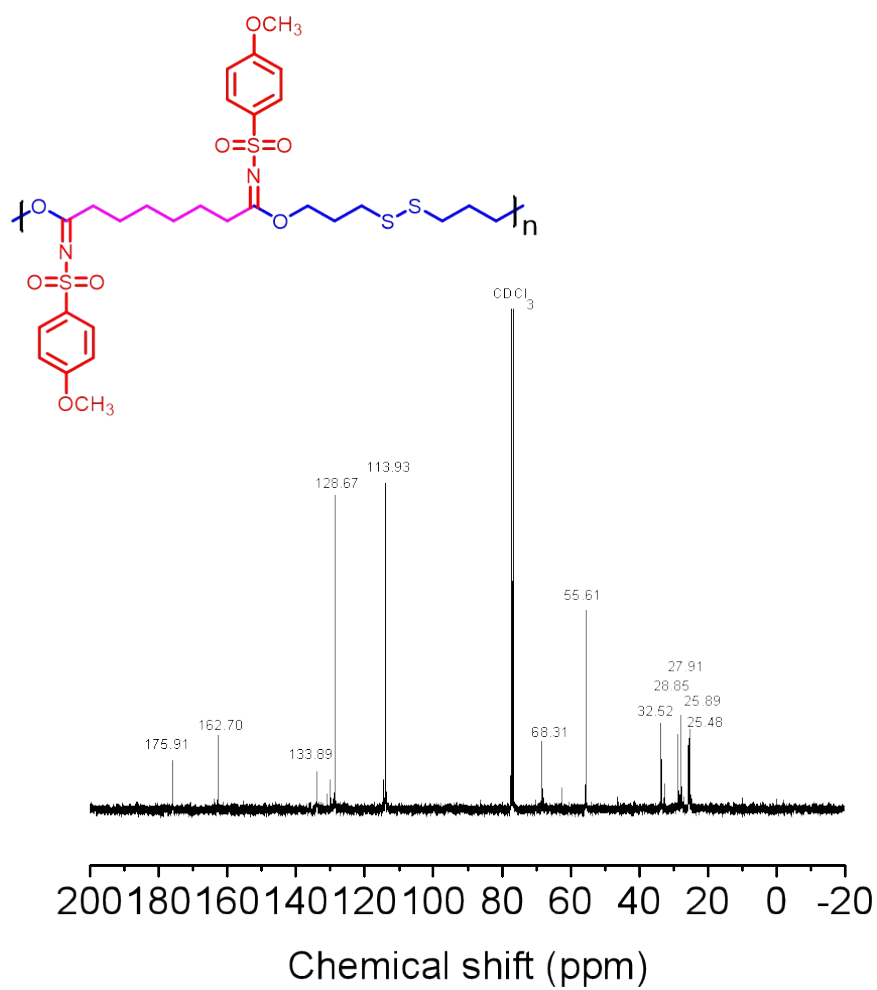

Figure S44.  $^{13}\text{C}$  NMR spectrum of P14 (P1a/2c/3b) in  $\text{CDCl}_3$ .

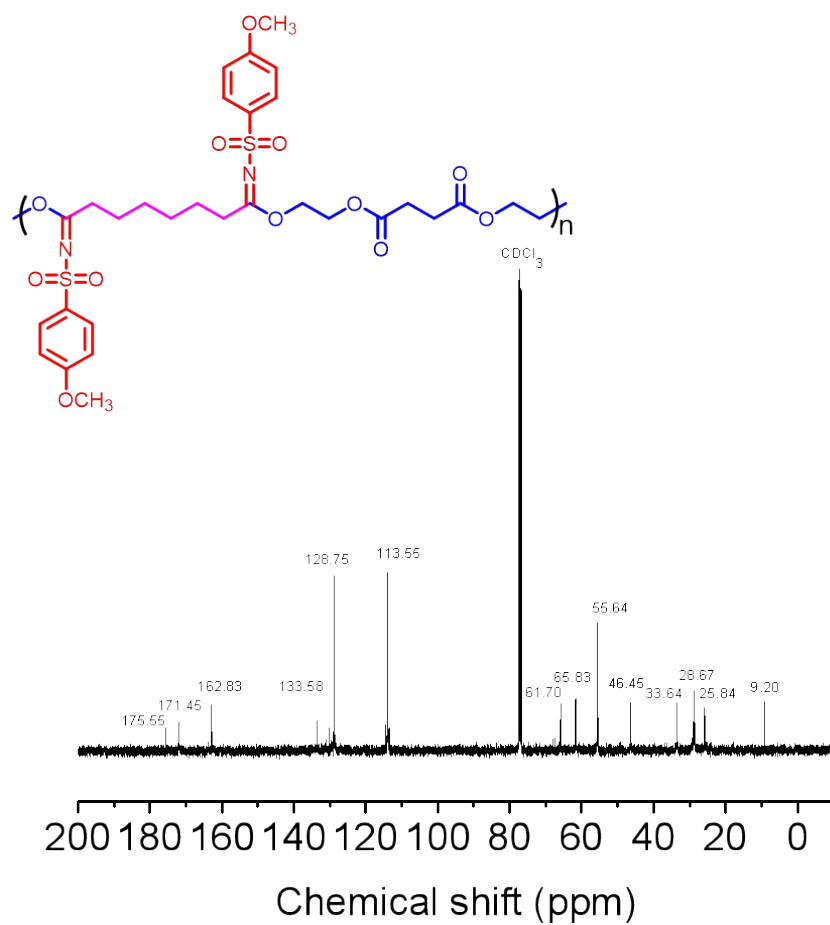

Figure S45.  $^{13}\text{C}$  NMR spectrum of P15 (P1a/2c/3c) in  $\text{CDCl}_3$ .

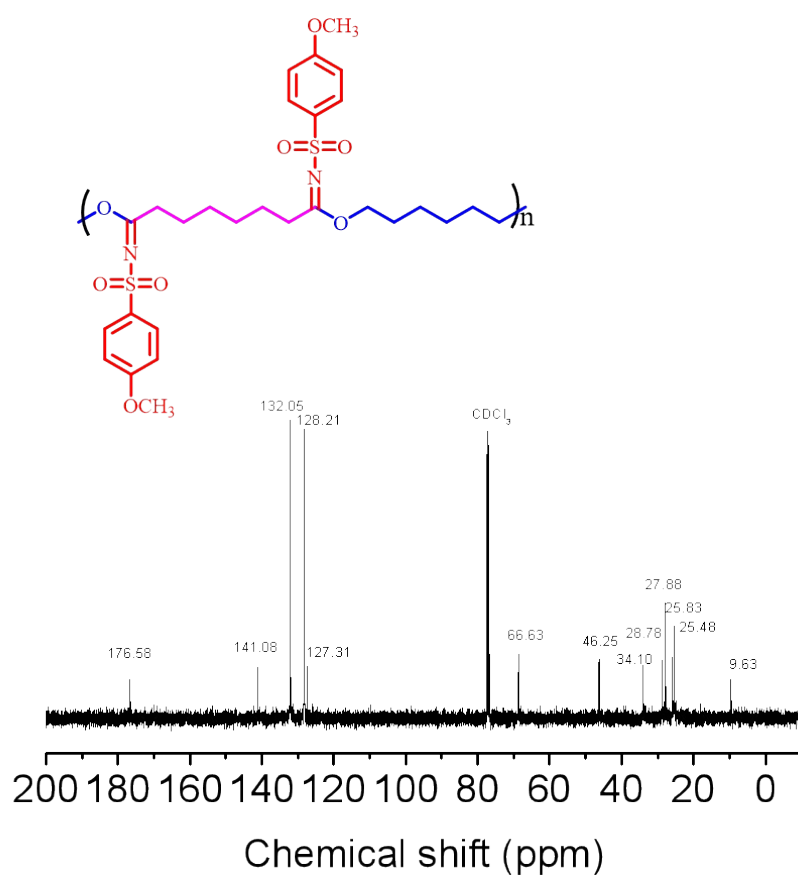

Figure S46.  $^{13}\text{C}$  NMR spectrum of P16 (P1a/2c/3d) in  $\text{CDCl}_3$ .

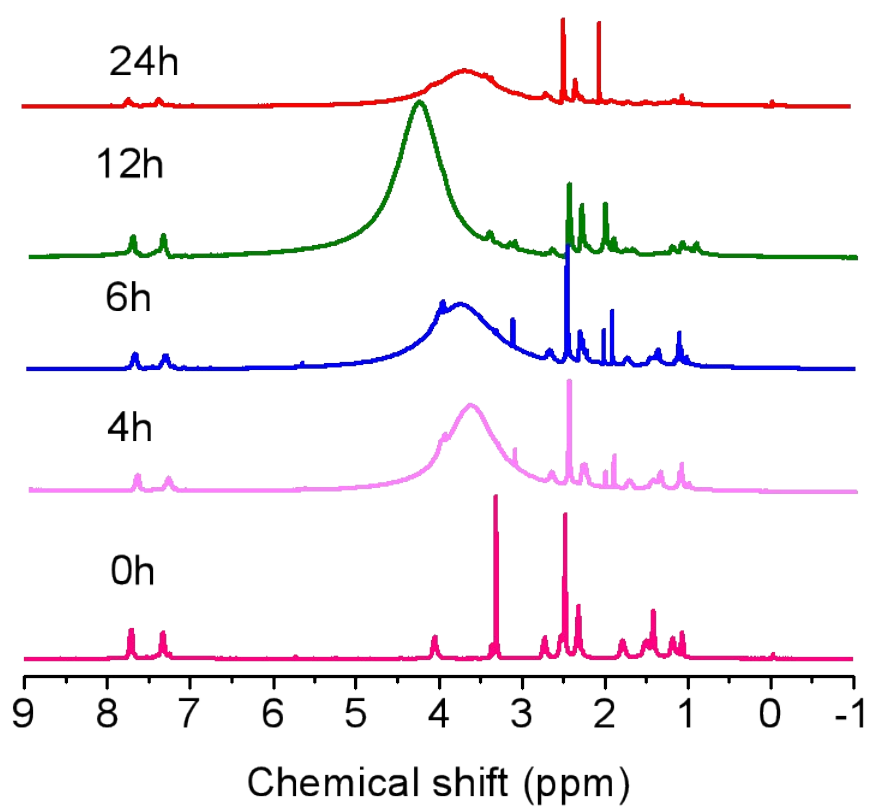

Figure S47. <sup>1</sup>H NMR spectra of P1 (P1a/2a/3a) following H<sub>2</sub>O<sub>2</sub> treatment at different time intervals in *d*-DMSO.



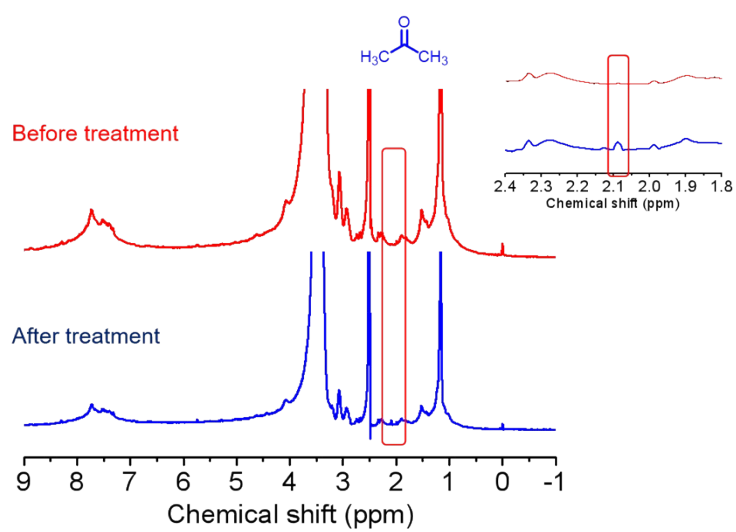

Figure S48.  $^1\text{H}$  NMR spectra of P7-TPP before and after light (650 nm) treatment in  $d$ -DMSO.

Table S1. The conjugation efficiency of TPP on the side chain of P7<sup>a</sup>

| TPP polymers | Feeding ratio of TPP (%) | Conjugation efficiency (%) |
|--------------|--------------------------|----------------------------|
| P7-TPP1      | 25                       | 25                         |
| P7-TPP2      | 50                       | 50                         |
| P7-TPP3      | 100                      | 50                         |

<sup>a</sup>Conditions: experiments carried out at 70 °C under nitrogen in THF. CuI = 0.04 M, PdCl<sub>2</sub>(PPh<sub>3</sub>)<sub>2</sub> = 0.02 M.
